# Supplementary material for: 100% Fruit juice intake and cardiovascular risk: a systematic review and meta-analysis of prospective and randomised controlled studies
Source: Springer Nature journal article supplement (doi:10.1007/s00394-020-02426-7), 2020-11-04
Supplement: MOESM1 [file 18554440]

## Supplemental Table 1. The PRISMA Checklist

| Section/topic             | # | Checklist item                                                                                                                                                                                                                                                                                              | Reported on page #                                       |
|---------------------------|---|-------------------------------------------------------------------------------------------------------------------------------------------------------------------------------------------------------------------------------------------------------------------------------------------------------------|----------------------------------------------------------|
| <b>TITLE</b>              |   |                                                                                                                                                                                                                                                                                                             |                                                          |
| Title                     | 1 | Identify the report as a systematic review, meta-analysis, or both.                                                                                                                                                                                                                                         | 1                                                        |
| <b>ABSTRACT</b>           |   |                                                                                                                                                                                                                                                                                                             |                                                          |
| Structured summary        | 2 | Provide a structured summary including, as applicable: background; objectives; data sources; study eligibility criteria, participants, and interventions; study appraisal and synthesis methods; results; limitations; conclusions and implications of key findings; systematic review registration number. | 2                                                        |
| <b>INTRODUCTION</b>       |   |                                                                                                                                                                                                                                                                                                             |                                                          |
| Rationale                 | 3 | Describe the rationale for the review in the context of what is already known.                                                                                                                                                                                                                              | 4                                                        |
| Objectives                | 4 | Provide an explicit statement of questions being addressed with reference to participants, interventions, comparisons, outcomes, and study design (PICOS).                                                                                                                                                  | 4                                                        |
| <b>METHODS</b>            |   |                                                                                                                                                                                                                                                                                                             |                                                          |
| Protocol and registration | 5 | Indicate if a review protocol exists, if and where it can be accessed (e.g., Web address), and, if available, provide registration information including registration number.                                                                                                                               | 5                                                        |
| Eligibility criteria      | 6 | Specify study characteristics (e.g., PICOS, length of follow-up) and report characteristics (e.g., years considered, language, publication status) used as criteria for eligibility, giving rationale.                                                                                                      | 5-6,<br>Supplemental<br>Tables                           |
| Information sources       | 7 | Describe all information sources (e.g., databases with dates of coverage, contact with study authors to identify additional studies) in the search and date last searched.                                                                                                                                  | 5,<br>Supplemental<br>Tables                             |
| Search                    | 8 | Present full electronic search strategy for at least one database, including any limits used, such that it could be repeated.                                                                                                                                                                               | 5,<br>Supplemental<br>Tables,<br>Supplemental<br>Figures |
| Study selection           | 9 | State the process for selecting studies (i.e., screening, eligibility, included in systematic review, and, if applicable, included in the meta-analysis).                                                                                                                                                   | 5-7<br>Supplemental<br>Tables,<br>Supplemental           |

|                                    |    |                                                                                                                                                                                                                        |                                                                   |
|------------------------------------|----|------------------------------------------------------------------------------------------------------------------------------------------------------------------------------------------------------------------------|-------------------------------------------------------------------|
|                                    |    |                                                                                                                                                                                                                        | Figures                                                           |
| Data collection process            | 10 | Describe method of data extraction from reports (e.g., piloted forms, independently, in duplicate) and any processes for obtaining and confirming data from investigators.                                             | 5-6<br>Supplemental<br>Tables,<br>Supplemental<br>Figures         |
| Data items                         | 11 | List and define all variables for which data were sought (e.g., PICOS, funding sources) and any assumptions and simplifications made.                                                                                  | 5-7<br>Supplemental<br>Tables,<br>Supplemental<br>Figures         |
| Risk of bias in individual studies | 12 | Describe methods used for assessing risk of bias of individual studies (including specification of whether this was done at the study or outcome level), and how this information is to be used in any data synthesis. | 6                                                                 |
| Summary measures                   | 13 | State the principal summary measures (e.g., risk ratio, difference in means).                                                                                                                                          | 7,8                                                               |
| Synthesis of results               | 14 | Describe the methods of handling data and combining results of studies, if done, including measures of consistency (e.g., $I^2$ ) for each meta-analysis.                                                              | 7,8                                                               |
| Risk of bias across studies        | 15 | Specify any assessment of risk of bias that may affect the cumulative evidence (e.g., publication bias, selective reporting within studies).                                                                           | 7,8                                                               |
| Additional analyses                | 16 | Describe methods of additional analyses (e.g., sensitivity or subgroup analyses, meta-regression), if done, indicating which were pre-specified.                                                                       | 7,8                                                               |
| <b>RESULTS</b>                     |    |                                                                                                                                                                                                                        |                                                                   |
| Study selection                    | 17 | Give numbers of studies screened, assessed for eligibility, and included in the review, with reasons for exclusions at each stage, ideally with a flow diagram.                                                        | 8,9,11,12<br>Supplementa<br>l Tables,<br>Supplementa<br>l Figures |
| Study characteristics              | 18 | For each study, present characteristics for which data were extracted (e.g., study size, PICOS, follow-up period) and provide the citations.                                                                           | 8,9,11,12<br>Supplementa<br>l Tables,                             |
| Risk of bias within studies        | 19 | Present data on risk of bias of each study and, if available, any outcome level assessment (see item 12).                                                                                                              | 8,9,11,12<br>Supplementa                                          |

|                               |    |                                                                                                                                                                                                          |                                                 |
|-------------------------------|----|----------------------------------------------------------------------------------------------------------------------------------------------------------------------------------------------------------|-------------------------------------------------|
|                               |    |                                                                                                                                                                                                          | I Tables                                        |
| Results of individual studies | 20 | For all outcomes considered (benefits or harms), present, for each study: (a) simple summary data for each intervention group (b) effect estimates and confidence intervals, ideally with a forest plot. | 9-14, Supplemental Tables, Supplemental Figures |
| Synthesis of results          | 21 | Present results of each meta-analysis done, including confidence intervals and measures of consistency.                                                                                                  | 9-14 Supplemental Tables, Supplemental Figures  |
| Risk of bias across studies   | 22 | Present results of any assessment of risk of bias across studies (see Item 15).                                                                                                                          | 9-14 Supplemental Tables, Supplemental Figures  |
| Additional analysis           | 23 | Give results of additional analyses, if done (e.g., sensitivity or subgroup analyses, meta-regression [see Item 16]).                                                                                    | 9-14 Supplemental Tables, Supplemental Figures  |
| <b>DISCUSSION</b>             |    |                                                                                                                                                                                                          |                                                 |
| Summary of evidence           | 24 | Summarize the main findings including the strength of evidence for each main outcome; consider their relevance to key groups (e.g., healthcare providers, users, and policy makers).                     | 14-18                                           |
| Limitations                   | 25 | Discuss limitations at study and outcome level (e.g., risk of bias), and at review-level (e.g., incomplete retrieval of identified research, reporting bias).                                            | 18-19                                           |
| Conclusions                   | 26 | Provide a general interpretation of the results in the context of other evidence, and implications for future research.                                                                                  | 19-21                                           |
| <b>FUNDING</b>                |    |                                                                                                                                                                                                          |                                                 |
| Funding                       | 27 | Describe sources of funding for the systematic review and other support (e.g., supply of data); role of funders for the systematic review.                                                               | 3                                               |

**Supplemental Table 2. Newcastle-Ottawa Quality Assessment Scale for cohort studies included in the meta-analysis**

| META-ANALYSES              | SELECTION                                |                                     |                           |                                                                          | COMPARABILITY | OUTCOME               |                                                 |                                  | TOTAL SCORE |
|----------------------------|------------------------------------------|-------------------------------------|---------------------------|--------------------------------------------------------------------------|---------------|-----------------------|-------------------------------------------------|----------------------------------|-------------|
|                            | Representativeness of the exposed cohort | Selection of the non-exposed cohort | Ascertainment of exposure | Demonstration that outcome of interest was not present at start of study |               | Assessment of outcome | Was follow-up long enough for outcomes to occur | Adequacy of follow up of cohorts |             |
| <b>Cardiovascular risk</b> |                                          |                                     |                           |                                                                          |               |                       |                                                 |                                  |             |
| Collin et al., 2019        | *                                        | *                                   | *                         | *                                                                        | **            | *                     | *                                               | *                                | <b>9</b>    |
| Hansen et al., 2010        | *                                        | *                                   | *                         | *                                                                        | **            | *                     | *                                               | *                                | <b>9</b>    |
| Hung et al., 2004          |                                          | *                                   | *                         | *                                                                        | **            | *                     | *                                               |                                  | <b>7</b>    |
| Joshiyura et al., 1999     |                                          | *                                   | *                         | *                                                                        | **            | *                     | *                                               | *                                | <b>8</b>    |
| Joshiyura et al., 2001     |                                          | *                                   | *                         | *                                                                        | **            | *                     | *                                               | *                                | <b>8</b>    |
| Joshiyura et al., 2008     |                                          | *                                   | *                         | *                                                                        | **            | *                     | *                                               |                                  | <b>7</b>    |
| Lai et al., 2015           |                                          | *                                   | *                         | *                                                                        | **            | *                     | *                                               |                                  | <b>7</b>    |
| Mink et al., 2007          |                                          | *                                   | *                         | *                                                                        | **            | *                     | *                                               | *                                | <b>8</b>    |
| Scheffers et al., 2018     | *                                        | *                                   | *                         | *                                                                        | **            | *                     | *                                               |                                  | <b>8</b>    |
| Simila et al., 2013        |                                          | *                                   | *                         | *                                                                        | **            | *                     | *                                               |                                  | <b>7</b>    |
| <b>Diabetes</b>            |                                          |                                     |                           |                                                                          |               |                       |                                                 |                                  |             |
| Auerbach et al., 2017      |                                          | *                                   | *                         | *                                                                        | **            | *                     | *                                               |                                  | <b>7</b>    |
| Bazzano et al., 2008       |                                          | *                                   | *                         | *                                                                        | **            |                       | *                                               |                                  | <b>6</b>    |
| Fagherazzi et al., 2013    |                                          | *                                   | *                         | *                                                                        | **            | *                     | *                                               | *                                | <b>8</b>    |
| Interact et al., 2013      | *                                        | *                                   | *                         | *                                                                        | **            | *                     | *                                               | *                                | <b>9</b>    |
| Muraki et al., 2013        |                                          | *                                   | *                         | *                                                                        | **            | *                     | *                                               | *                                | <b>8</b>    |
| Mursu et al., 2014         |                                          | *                                   | *                         | *                                                                        | **            | *                     | *                                               | *                                | <b>8</b>    |
| O'Connor et al., 2015      | *                                        | *                                   | *                         | *                                                                        | **            | *                     | *                                               |                                  | <b>8</b>    |
| Odegaard et al., 2010      | *                                        | *                                   | *                         | *                                                                        | **            | *                     | *                                               | *                                | <b>9</b>    |
| Palmer et al., 2008        |                                          | *                                   | *                         | *                                                                        | **            |                       | *                                               | *                                | <b>7</b>    |
| Scheffers et al., 2020     | *                                        | *                                   | *                         | *                                                                        | **            | *                     | *                                               |                                  | <b>8</b>    |
| <b>Hypertension</b>        |                                          |                                     |                           |                                                                          |               |                       |                                                 |                                  |             |
| Auerbach et al., 2017      |                                          | *                                   | *                         | *                                                                        | **            | *                     | *                                               |                                  | <b>7</b>    |
| Cardia et al., 2010        | *                                        | *                                   | *                         |                                                                          | **            | *                     | *                                               |                                  | <b>7</b>    |



### Supplemental Table 3. Risk of bias of the randomised controlled trials included in the meta-analysis

| Studies with intention-to-treat | Study ID             | Randomization process | Deviations from intended interve | Missing outcome data | Measurement of the outcome | Selection of the reported result | Overall |
|---------------------------------|----------------------|-----------------------|----------------------------------|----------------------|----------------------------|----------------------------------|---------|
|                                 | Bakurazde 2019       | ?                     | ?                                | -                    | +                          | ?                                | -       |
|                                 | Basu (I) 2010        | ?                     | -                                | -                    | +                          | -                                | -       |
|                                 | Basu (II) 2010       | ?                     | ?                                | +                    | +                          | -                                | -       |
|                                 | Basu (III) 2011      | ?                     | ?                                | +                    | +                          | -                                | -       |
|                                 | Buscemi 2012         | ?                     | +                                | +                    | +                          | +                                | !       |
|                                 | Cerdà 2006           | ?                     | +                                | +                    | +                          | ?                                | !       |
|                                 | Chai 2018            | +                     | +                                | +                    | +                          | ?                                | !       |
|                                 | Dohadwala (I) 2010   | +                     | ?                                | +                    | +                          | +                                | !       |
|                                 | Dohadwala (II) 2011  | +                     | ?                                | +                    | +                          | +                                | !       |
|                                 | Duthie 2006          | ?                     | ?                                | +                    | +                          | -                                | -       |
|                                 | Flammer 2013         | ?                     | ?                                | -                    | +                          | ?                                | -       |
|                                 | Gonzalez-Ortiz, 2011 | ?                     | +                                | +                    | +                          | ?                                | !       |
|                                 | Guo 2014             | +                     | +                                | +                    | +                          | ?                                | !       |
|                                 | Hollis 2009          | ?                     | +                                | +                    | +                          | ?                                | !       |
|                                 | Karlsen 2010         | +                     | +                                | +                    | +                          | ?                                | !       |
|                                 | Khan 2014            | +                     | +                                | +                    | +                          | ?                                | !       |
|                                 | Kojadinovic 2016     | -                     | +                                | +                    | +                          | ?                                | -       |
|                                 | Krikorian 2012       | ?                     | +                                | +                    | +                          | ?                                | !       |
|                                 | Loo 2016             | ?                     | +                                | +                    | +                          | ?                                | !       |
|                                 | Lynn (I) 2012        | +                     | ?                                | +                    | +                          | ?                                | !       |
|                                 | Lynn (II) 2014       | +                     | +                                | +                    | +                          | ?                                | !       |
|                                 | Moazzen 2017         | ?                     | +                                | +                    | +                          | ?                                | !       |
|                                 | Morand 2011          | ?                     | +                                | +                    | +                          | ?                                | !       |
|                                 | Neto 2017            | ?                     | +                                | +                    | +                          | ?                                | !       |
|                                 | Novotny 2015         | +                     | +                                | +                    | +                          | +                                | +       |
|                                 | Paquette 2017        | +                     | ?                                | +                    | +                          | +                                | !       |
|                                 | Park 2009            | ?                     | +                                | +                    | +                          | ?                                | !       |
|                                 | Ruel 2013            | ?                     | +                                | +                    | +                          | ?                                | !       |
|                                 | Shidfar 2012         | ?                     | +                                | +                    | +                          | +                                | !       |
|                                 | Siasos 2011          | ?                     | +                                | +                    | +                          | ?                                | !       |
|                                 | Silver 2011          | ?                     | ?                                | +                    | +                          | +                                | !       |
|                                 | Simpson 2016         | +                     | +                                | +                    | +                          | +                                | +       |
|                                 | Sohrab (I) 2014      | +                     | -                                | -                    | +                          | +                                | -       |
|                                 | Sohrab (II) 2015     | +                     | +                                | +                    | +                          | +                                | +       |
|                                 | Sumner 2005          | +                     | +                                | +                    | +                          | ?                                | !       |
|                                 | Tsang 2012           | ?                     | -                                | -                    | +                          | ?                                | -       |

+ Low risk  
? Some concerns  
- High risk

**Supplemental Table 4. Characteristics of the prospective studies included in the meta-analysis of the risk of cardiovascular events**

| First author, year   | Country          | Population                                                       | Participants (n)/ Events (n)                                                                   | Follow-up (years) | Type of Juice          | 100% Fruit Juice | Age (yrs) | BMI (kg/m <sup>2</sup> ) | Dietary assessment tool | Outcome (type of assessment)                                   |
|----------------------|------------------|------------------------------------------------------------------|------------------------------------------------------------------------------------------------|-------------------|------------------------|------------------|-----------|--------------------------|-------------------------|----------------------------------------------------------------|
| Collin, 2019 (17)    | USA              | REGARDS (59% men, 41% women)                                     | 13,440 / CHD: 168                                                                              | 6                 | All types              | Specified        | 63.6      | -                        | FFQ                     | CHD mortality (medical records and death certificates)         |
| Hansen, 2010 (16)    | Europe (Denmark) | Danish Diet, Cancer and Health cohort study (47% men, 53% women) | 54,383 / CHD: 1,075                                                                            | 7.7               | Grape and orange juice | Unspecified      | 55        | 26                       | FFQ                     | Acute coronary syndrome (National registry and Death registry) |
| Hung, 2004 (33)      | USA              | NHS (women) & HPFS (men)                                         | NHS 71,910 / Total CV: 1,964 & HPFS 37,725 / Total CV: 1,670                                   | NHS 14            | Citrus juice           | Unspecified      | -         | -                        | FFQ                     | CV events [myocardial infarction & stroke] (medical records)   |
|                      |                  |                                                                  |                                                                                                | HPFS 12           |                        |                  |           |                          |                         |                                                                |
| Joshiyura, 1999 (11) | USA              | NHS (women)                                                      | 75,596 / Stroke: 366                                                                           | 14                | Citrus juice           | Unspecified      | 46.2      | 24.3                     | FFQ                     | Stroke events (confirmed by medical records)                   |
|                      | USA              | HPFS (men)                                                       | 38,683 / Stroke: 204                                                                           | 8                 |                        |                  | 53.7      | 25.4                     | FFQ                     |                                                                |
| Joshiyura, 2001 (34) | USA              | NHS (women)                                                      | 84,251 / CHD: 1127                                                                             | 14                | Citrus juice           | Unspecified      | -         | -                        | FFQ                     | CHD (medical records reviewed by physicians)                   |
|                      | USA              | HPFS (men)                                                       | 42,148 / CHD: 1063                                                                             | 8                 |                        |                  |           |                          | FFQ                     |                                                                |
| Joshiyura, 2009 (15) | USA              | NHS (women) & HPFS (men)                                         | *Low (<40%)<br>Moderate (40-55%)<br>NHS 70,870 / Total CV: 1852 & HPFS 38,918 / Total CV: 2040 | 16                | Citrus juice           | Unspecified      | 61.2      | 26.0                     | FFQ                     | Total CV events [CHD & stroke events] (medical records)        |

|                      |                      |                                                               | High (>55%)                                                |      |                                 |             |      |      |     |                                                                                                |
|----------------------|----------------------|---------------------------------------------------------------|------------------------------------------------------------|------|---------------------------------|-------------|------|------|-----|------------------------------------------------------------------------------------------------|
|                      |                      |                                                               |                                                            | 14   |                                 |             | 59.7 | 26.2 | FFQ |                                                                                                |
| Lai, 2015 (13)       | Europe (UK)          | Women's cohort Study (women)                                  | 30,458 /<br>Total CV: 286<br>Stroke: 148<br>CHD: 138       | 16.7 | All types                       | Specified   | 51.6 | 24.3 | FFQ | CV mortality (UK's NHS Central Register)                                                       |
| Mink, 2007 (12)      | USA                  | Iowa Women's Health Study (Post-menopausal women)             | 34,492 /<br>Stroke: 469<br>CHD: 1,329                      | 16   | Citrus juice, other fruit juice | Unspecified | 61.5 | 26.9 | FFQ | Total CV mortality (State Health Registry)                                                     |
| Scheffers, 2018 (14) | Europe (Netherlands) | MORGEN & Prospect cohort (26% men, 74% women)                 | 34,560 /<br>Total CV: 3,801<br>Stroke: 1,135<br>CHD: 2,135 | 14.6 | All types                       | Specified   | 48.8 | 25.5 | FFQ | Total CV events, [& Stroke events & CHD events] (Hospital Register and Statistics Netherlands) |
| Simila, 2013 (32)    | Europe (Finland)     | Alpha-Tocopherol, Beta-carotene Cancer Prevention Study (men) | 21,995 /<br>CHD: 4,379                                     | 19   | All types                       | Unspecified | 56.6 | 25.8 | FFQ | CHD events (National registry and Death registry)                                              |

CHD: coronary heart disease, CV: cardiovascular, FFQ: food-frequency questionnaire, HPFS: Health Professionals' Follow-Up Study, MORGEN: Monitoring Project on Chronic Disease Risk Factors, NHS: Nurses' Health Study, REGARDS: The Reasons for Geographic and Racial Differences in Stroke study; \* Risk stratified by percentage of energy from carbohydrate intake



**Supplemental Table 5. Characteristics of the prospective studies included in the meta-analysis of the risk of diabetes and hypertension**

| First author, year (ref)       | Country               | Population                                            | Participants (n)/ Cases (n)             | Follow-up (year) | Type of Juice | 100% Fruit Juice | Age (year) | BMI (kg/m <sup>2</sup> ) | Dietary assessment tool | Outcome (type of assessment)                                                                                                                                  |
|--------------------------------|-----------------------|-------------------------------------------------------|-----------------------------------------|------------------|---------------|------------------|------------|--------------------------|-------------------------|---------------------------------------------------------------------------------------------------------------------------------------------------------------|
| Auerbach, 2017 (35)            | USA                   | The Women's Health Initiative (post-menopausal women) | 114,219 / 11,488 [HPT: 80,539 / 36,314] | 7.8              | All types     | Specified        | 64.5       | -                        | FFQ                     | Self-reported diagnosis (diabetes & hypertension)                                                                                                             |
| Bazzano, 2008 (36)             | USA                   | The Nurses' Health Study (women)                      | 71,346 / 4,529                          | 18               | All types     | Unspecified      | 50.1       | 23.6                     | FFQ                     | Self-reported diagnosis (diabetes)                                                                                                                            |
| Duffey, 2010 (37)              | USA                   | CARDIA (46% men, 54% women)                           | 2639 / HPT: 609                         | 20               | All types     | Unspecified      | 25.5       | 24.5                     | Questionnaire           | Diagnosis by physicians (hypertension)                                                                                                                        |
| Fagherazzi, 2013 (38)          | Europe (France)       | E3N (women)                                           | 66,118 / 1,369                          | 14               | All types     | Specified        | 52.8       | 22.8                     | Questionnaire           | Self-reported diagnosis validated by physicians (diabetes)                                                                                                    |
| Interact consortium, 2013 (39) | Europe (multicentric) | EPIC-Interact study (38% men, 62% women)              | 27,058 / 11,684                         | 11.7             | All types     | Unspecified      | 52.4       | 26                       | FFQ                     | Self-report, linkage to primary-care registers, secondary-care registers, medication use (drug registers), hospital admissions and mortality data (diabetes). |
| Muraki, 2013 (40)              | USA                   | NHS, NHS II, HPFS                                     | 187,382 / 12,198                        | 19.6             | All types     | Unspecified      | 45.7       | -                        | FFQ                     | Self-reported diagnosis validated by physicians (diabetes)                                                                                                    |

|                      |                      |                                                         |                |      |                            |             |      |      |     |                                                                                                                                                                                                                      |
|----------------------|----------------------|---------------------------------------------------------|----------------|------|----------------------------|-------------|------|------|-----|----------------------------------------------------------------------------------------------------------------------------------------------------------------------------------------------------------------------|
| Mursu,2014 (41)      | Europe (Finland)     | KIHD (men)                                              | 2,332 / 432    | 19.3 | Fruit and berry juices     | Unspecified | 53   | 26.6 | FFQ | Self-reported diagnosis confirmed by record linkage to the national hospital discharge registry and to the Social Insurance Institution of Finland reimbursement register on diabetes-medication expenses (diabetes) |
| O'Connor, 2015 (42)  | Europe (UK)          | The EPIC-Norfolk study (45% men, 55% women)             | 25,639 / 847   | 10.8 | All types                  | Specified   | 58.7 | 26.3 | FFQ | Self reported diagnosis and external sources (national diabetes registers and Office of National Statistics mortality) (diabetes)                                                                                    |
| Odegaard, 2009 (43)  | Asia (China)         | The Singapore Chinese Health Study (48% men, 52% women) | 43,580 / 2,273 | 5.7  | All types                  | Unspecified | 54.8 | 23.1 | FFQ | At baseline self reported diagnosis; At follow-up hospital records and biomarkers (diabetes)                                                                                                                         |
| Palmer,2008 (44)     | USA                  | BWHS (women)                                            | 43,960 / 2,713 | 7.7  | Orange or grapefruit juice | Specified   | 38.2 | 27.6 | FFQ | Self-reported diagnosis (diabetes)                                                                                                                                                                                   |
| Scheffers, 2020 (45) | Europe (Netherlands) | MORGEN & Prospect cohort (26% men, 74% women)           | 36,147 / 1,477 | 14.6 | All types                  | Specified   | 49   | 25.6 | FFQ | Self-reported diagnosis confirmed by record linkage to the national hospital Register or validated by physicians (diabetes)                                                                                          |

BWHS: Black Women's Health Study, CARDIA: The Coronary Artery Risk Development in Young Adults study, E3N: French Etude Epidemiologique aupres des femmes de la Mutuelle Generale de l'Education Nationale-European Prospective Investigation into Cancer and Nutrition cohort data, EPIC: European Prospective Investigation into Cancer and Nutrition study, HPFS: Health Professionals Follow-up Study, KIHD: Kuopio Ischaemic Heart Disease Risk Factor Study, MORGEN: Monitoring Project on Chronic Disease Risk Factors, NHS: Nurses' Health Study

**Supplemental Table 6. Characteristics of the randomised controlled trials included in the meta-analysis**

| First author, year (ref) | Country          | Total number of participants (men/women) | Selected features of the study participants | Duration of intervention (weeks) | Type of Juice and Comparison | Juice characteristics (as reported by the authors of the study)                                                                                                                                                                                                                                         | Age (yrs) | BMI (kg/m <sup>2</sup> ) | Outcomes | Study design |
|--------------------------|------------------|------------------------------------------|---------------------------------------------|----------------------------------|------------------------------|---------------------------------------------------------------------------------------------------------------------------------------------------------------------------------------------------------------------------------------------------------------------------------------------------------|-----------|--------------------------|----------|--------------|
| Bakuradze,2019 (46)      | Europe (Germany) | 57 (57/0)                                | Healthy subjects                            | 8                                | Mix juice (750 ml/day)       | 100% fruit content - red grape juice, lingonberry juice from concentrate, apple, blueberry and strawberry puree, aronia juice from concentrate, acerola puree.<br>Glucose: 65.2 g/l,<br>Fructose: 70.5 g/l<br>Sucrose: 3.8 g/l<br>Polyphenols: 3.6 g/l<br>Anthocyanins: 274 mg/l<br>Vitamin C: 564 mg/l | 23        | 23                       | BW,LP    | PA           |
|                          |                  |                                          |                                             |                                  | Placebo (750 ml/day)         |                                                                                                                                                                                                                                                                                                         | 24        | 23                       |          |              |

|                         |                        |              |                                               |   |                                                         |                                                                                                                                                                                                                                                                                 |      |      |             |       |
|-------------------------|------------------------|--------------|-----------------------------------------------|---|---------------------------------------------------------|---------------------------------------------------------------------------------------------------------------------------------------------------------------------------------------------------------------------------------------------------------------------------------|------|------|-------------|-------|
| Basu (I), 2010<br>(47)  | North America<br>(USA) | I: 25 (2/23) | Obese participants with<br>metabolic syndrome | 8 | Blueberry juice (480<br>ml/day) + water (480<br>ml/day) | 50 g freeze-dried<br>blueberries, water,<br>vanilla extract.<br>Energy: 174 kcal<br>Protein: 1.7 g<br>Carbohydrates: 42.3<br>g<br>Sugars: 30.0 g<br>Fibre: 9.3 g<br>Polyphenols: 1624<br>mg<br>Anthocyanins: 742<br>mg<br>Vitamin C: 86 mg<br>Potassium: 204 mg<br>Sodium: 8 mg | 51.5 | 38.1 | BP,BW,LP,GP | PA-SB |
|                         |                        | C: 23 (2/21) |                                               |   | Water (960 ml/day)                                      |                                                                                                                                                                                                                                                                                 | 48.0 | 37.5 |             |       |
| Basu (II), 2010<br>(48) | North America<br>(USA) | I: 15 (0/15) | Metabolic syndrome                            | 8 | Strawberry (480<br>ml/day) + water (480<br>ml/day)      | 50 g freeze-dried<br>strawberry powder,<br>water, vanilla<br>essence.<br>Energy: 150 kcal<br>Carbohydrates: 33 g<br>Protein: 3.5 g<br>Fat: 0.5 g<br>Fibre: 8%<br>Polyphenols: 2006<br>mg<br>Anthocyanins: 154<br>mg<br>Vitamin C: 109 mg<br>Phytosterols: 50 mg                 | 48.0 | 39.0 | BP,BW,LP,GP | PA    |
|                         |                        | C: 12 (2/10) |                                               |   | Water (960 ml/day)                                      |                                                                                                                                                                                                                                                                                 | 45.0 | 36.4 |             |       |

|                          |                           |              |                                                       |   |                                    |                                                                                                                                                                                                                                                  |      |      |           |       |
|--------------------------|---------------------------|--------------|-------------------------------------------------------|---|------------------------------------|--------------------------------------------------------------------------------------------------------------------------------------------------------------------------------------------------------------------------------------------------|------|------|-----------|-------|
| Basu (III), 2011<br>(49) | North<br>America<br>(USA) | I: 15 (0/15) | Metabolic syndrome                                    | 8 | Cranberry juice (480<br>ml/day)    | 27% cranberry juice<br>with water, sucralose<br>and acesulfame K<br>(commercially<br>available).<br>Energy: 40 kcal<br>Fructose: 4.8 g<br>Glucose: 1.8 g<br>Sucrose: 0.1 g<br>Polyphenol: 229 mg<br>Anthocyanins: 12.4<br>mg<br>Vitamin C: 60 mg | 52.0 | 40.0 | BP,LP,GP  | PA-DB |
|                          |                           | C: 16 (0/16) |                                                       |   | Placebo (480 ml/day)               |                                                                                                                                                                                                                                                  |      |      |           |       |
| Buscemi,2012<br>(50)     | Europe<br>(Italy)         | 19 (10/9)    | Increased<br>cardiovascular risk,<br>without diabetes | 1 | (Red) Orange Juice<br>(500 ml/day) | 100% red orange<br>juice.<br>Polyphenols: 419<br>mg/l<br>Anthocyanins: 71.3<br>mg/l<br>Narirutin: 43 mg/l<br>Hesperidin: 319 mg/l<br>Vitamin C: 481 mg/l<br>Total carotenoids:<br>5.5 mg/l                                                       | 48.0 | 32.1 | BW,GP,FMD | CO-SB |
|                          |                           |              |                                                       |   | Placebo (500 ml/day)               |                                                                                                                                                                                                                                                  |      |      |           |       |
| Cerdà, 2006 (51)         | Europe<br>(Spain)         | I:15 (15/0)  | Chronic obstructive<br>pulmonary disease              | 5 | Pomegranate juice<br>(400 ml/day)  | 100% pomegranates<br>juice.<br>Polyphenols: 2.66 g<br>Anthocyanins: 0.19 g                                                                                                                                                                       | 60.0 | 31.4 | LP,GP     | PA-DB |
|                          |                           | C:15 (15/0)  |                                                       |   | Placebo (400 ml/day)               |                                                                                                                                                                                                                                                  |      |      |           |       |

|                           |                     |              |                                |    |                                   |                                                                                                                                                                                                                                                                                                       |      |      |                  |       |
|---------------------------|---------------------|--------------|--------------------------------|----|-----------------------------------|-------------------------------------------------------------------------------------------------------------------------------------------------------------------------------------------------------------------------------------------------------------------------------------------------------|------|------|------------------|-------|
| Chai, 2018 (52)           | North America (USA) | I: 20 (8/12) | Older subjects                 | 12 | Tart cherry juice (480 ml/day)    | Montmorency tart cherry concentrate (68 ml) diluted with water (412 ml) (commercially available)<br>Energy: 181 kcal<br>Carbohydrate: 43 g<br>Protein: 2.3 g<br>Fibre: -<br>Fat: -<br>Polyphenols: 450.6 mg<br>Total tannins: 95.9 mg<br>Thiamin: 11 mcg<br>Folic acid: 18.6 mcg<br>Potassium: 355 mg | 70.0 | 28.5 | BP,BW,LP,GP      | PA-DB |
|                           |                     | C: 17 (9/8)  |                                |    | Placebo (480 ml/day)              |                                                                                                                                                                                                                                                                                                       | 69.5 | 27.3 |                  |       |
| Dohadwala (I), 2010 (53)  | North America (USA) | 64 (44/20)   | Pre- and stage 1 hypertension  | 8  | Concord Grape juice (7 mL/Kg/day) | 100% concord grape juice.<br>Energy: 160 kcal/240 ml<br>Sugars: 39 g/240 ml (52% fructose, 48% glucose)<br>Polyphenols: 472.8 mg/240 ml                                                                                                                                                               | 43   | 28   | AS,BP,BW,LP,GP   | CO-DB |
|                           |                     |              |                                |    | Placebo (7 ml/Kg/day)             |                                                                                                                                                                                                                                                                                                       |      |      |                  |       |
| Dohadwala (II), 2011 (54) | North America (USA) | 44 (30/14)   | Stable coronary artery disease | 4  | Cranberry juice (480mL/day)       | 54% cranberry juice (commercially available).<br>Energy: 40 kcal<br>Carbohydrates: 10 g<br>Polyphenols: 825 mg<br>Anthocyanins: 94 mg                                                                                                                                                                 | 62   | 29.5 | AS,BP,LP,GP, FMD | CO-DB |

|                       |                           |               |                                                                                                                     |    |                                 |                                                                                                                                                                                                                                                                     |      |      |       |       |
|-----------------------|---------------------------|---------------|---------------------------------------------------------------------------------------------------------------------|----|---------------------------------|---------------------------------------------------------------------------------------------------------------------------------------------------------------------------------------------------------------------------------------------------------------------|------|------|-------|-------|
|                       |                           |               |                                                                                                                     |    | Placebo<br>(480 ml/day)         |                                                                                                                                                                                                                                                                     |      |      |       |       |
| Duthie, 2006<br>(55)  | Europe<br>(Scotland)      | I: 11 (0/11)  | Healthy subjects                                                                                                    | 2  | Cranberry juice (750<br>ml/day) | Cranberry juice<br>(commercially<br>available<br>Polyphenols 1136<br>mg/l<br>Anthocyanins 2.80<br>mg/l<br>Vitamin C: 897 mg/l                                                                                                                                       | 27.3 | -    | LP    | PA    |
|                       |                           | C: 9 (0/9)    |                                                                                                                     |    | Placebo (750 ml/day)            |                                                                                                                                                                                                                                                                     | 28.3 | -    |       |       |
| Flammer, 2013<br>(56) | North<br>America<br>(USA) | I: 32 (20/12) | Patients with<br>endothelial dysfunction<br>and cardiovascular risk<br>factors or previous<br>cardiovascular events | 16 | Cranberry juice (460<br>ml/day) | 54% cranberry juice<br>with water, fructose<br>and sucralose<br>(commercially<br>available).<br>Fructose: 4.9 mg/ml<br>Glucose: 15.3 mg/ml<br>Sucrose: 0.6 mg/ml<br>Polyphenols: 1740<br>mcg/ml<br>Anthocyanins: 151<br>mcg/ml<br>ProAnthocyanidins:<br>2662 mcg/ml | 44.8 | 27.7 | BP,LP | PA-DB |
|                       |                           | C: 37 (11/26) |                                                                                                                     |    | Placebo (460 ml/day)            |                                                                                                                                                                                                                                                                     | 51.4 | 27.2 |       |       |

|                           |                        |            |                                                   |   |                                |                                                                                                                                                                                                                                                                                 |      |      |             |       |
|---------------------------|------------------------|------------|---------------------------------------------------|---|--------------------------------|---------------------------------------------------------------------------------------------------------------------------------------------------------------------------------------------------------------------------------------------------------------------------------|------|------|-------------|-------|
| Gonzalez-Ortiz, 2011 (57) | South America (Mexico) | I: 10 (NR) | Obese participants                                | 4 | Pomegranate juice (120 ml/day) | Pomegranate juice (commercially available).<br>Energy: 160 kcal/240 ml<br>Carbohydrate: 39 g/240 ml<br>Fibre: -<br>Sugars: 33 g/240 ml<br>Protein: 1 g/240 ml<br>Fats: -<br>Vitamin C: 4 mg/240 ml<br>Folate: 60 mcg/240 ml<br>Potassium: 490 mg/240 ml<br>Sodium: 20 mg/240 ml | 36.3 | 35.2 | BW,LP,GP    | PA-DB |
|                           |                        | C: 10 (NR) |                                                   |   | Placebo (120 ml/day)           |                                                                                                                                                                                                                                                                                 | 38.3 | 33.8 |             |       |
| Guo, 2014 (58)            | Asia (China)           | 44 (12/32) | Young adult participants with fatty liver disease | 4 | Bayberry juice (500 ml/day)    | 100% bayberry juice.<br>Sugars: 9.2 g/100 ml<br>Polyphenols: 270.2 mg/100 ml<br>Anthocyanins: 83.5 mg/100 ml<br>Vitamin C: 98.6 mg/100 ml                                                                                                                                       | 21.2 | 25.4 | BP,BW,LP,GP | CO-DB |
|                           |                        |            |                                                   |   | Placebo (500 ml/day)           |                                                                                                                                                                                                                                                                                 |      |      |             |       |



|                    |                     |               |                                                      |    |                                             |                                                                                                                                                                                                                                             |    |      |                   |       |
|--------------------|---------------------|---------------|------------------------------------------------------|----|---------------------------------------------|---------------------------------------------------------------------------------------------------------------------------------------------------------------------------------------------------------------------------------------------|----|------|-------------------|-------|
| Hollis, 2015 (59)  | North America (USA) | I: 25 (NR)    | Overweight participants                              | 12 | Concord grape juice (480 ml/day)            | 100% concord grape juice.<br>Energy: 175 kcal<br>Sugars: 41 g/240 ml (52% fructose, 48% glucose)<br>Polyphenols: 1945 mg/l<br>Anthocyanins 398 mg/l<br>ProAnthocyanidins: 639 mg/l                                                          | 22 | 27.0 | BW,LP,GP          | PA-DB |
|                    |                     | C: 26 (NR)    |                                                      |    | Placebo (480 ml/day)                        |                                                                                                                                                                                                                                             | 26 | 27.0 |                   |       |
| Karlsen, 2010 (60) | Europe (Norway)     | I: 31 (21/10) | Subjects at increased risk of cardiovascular disease | 4  | Bilberry juice (330 ml/day+670 ml of water) | 100% bilberry juice diluted with water.                                                                                                                                                                                                     | 53 | 25.6 | BW,LP             | PA    |
|                    |                     | C: 31 (25/6)  |                                                      |    | Water (1000 ml/day)                         |                                                                                                                                                                                                                                             | 53 | 25.5 |                   |       |
| Khan, 2014 (61)    | Europe (UK)         | I: 22 (15/7)  | Healthy subjects                                     | 6  | (Low) Blackcurrant juice (1000 ml/day)      | 6.4 blackcurrant juice diluted with water<br>Energy: 10.4 kcal/250 ml<br>Carbohydrate 1.7 g/250 ml<br>Sugars: 1.2 g/250 ml<br>Protein: 0.1 g/250 ml<br>Polyphenols: 27.3 mg/100 ml<br>Anthocyanins: 4 mg/100 ml<br>Vitamin C: 1.1 mg/100 ml | 55 | 28.4 | BP,BW,LP,FM<br>MD | PA-DB |

|                        |                     |              |       |                                                         |    |                                         |                                                                                                                                                                                                                                                  |       |      |             |         |
|------------------------|---------------------|--------------|-------|---------------------------------------------------------|----|-----------------------------------------|--------------------------------------------------------------------------------------------------------------------------------------------------------------------------------------------------------------------------------------------------|-------|------|-------------|---------|
|                        |                     | I: 21 (13/8) |       |                                                         |    | (High) Blackcurrant juice (1000 ml/day) | 20% blackcurrant juice diluted with water.<br>Energy: 10.4 kcal/250 ml<br>Carbohydrate 1.7 g/250 ml<br>Sugars: 1.2 g/250 ml<br>Protein: 0.1 g/250 ml<br>Polyphenols: 81.5 mg/100 ml<br>Anthocyanins: 14.3 mg/100 ml<br>Vitamin C: 10.2 mg/100 ml | 51    | 29.2 |             |         |
|                        |                     | C: 21 (15/6) |       |                                                         |    | Placebo (1000 ml/day)                   |                                                                                                                                                                                                                                                  | 51    | 28.9 |             |         |
| Kojadinovic, 2016 (62) | Europe (Serbia)     | I: 12 (0/12) |       | Metabolic syndrome                                      | 6  | Pomegranate juice (300 ml/day)          | 100% pomegranate juice.<br>Energy: 55 kcal<br>Protein: 0.8 g/kg<br>Carbohydrates: 135 g/kg<br>Polyphenols: 2.938 g/l<br>Anthocyanins: 0.021 g/l                                                                                                  | 40-60 | 32   | BP,BW,LP,GP | PA      |
|                        |                     | C: 11 (0/11) |       |                                                         |    | Water (300 ml/day)                      |                                                                                                                                                                                                                                                  |       |      |             |         |
| Krikorian, 2012 (63)   | North America (USA) | 21 (11/10)   | I: 10 | Older adults at risk for advancing cognitive impairment | 16 | Concord grape juice (6.3-7.8 ml/kg)     | 100% concord grape juice.<br>Polyphenols: 2091 mg/l<br>Anthocyanins: 425 mg/l<br>ProAnthocyanidins: 888 mg/l                                                                                                                                     | 78    | -    | BP,BW,GP    | PA – DB |

|                     |                  |              |                               |   |                                |                                                                                                                                                                                          |      |      |             |       |
|---------------------|------------------|--------------|-------------------------------|---|--------------------------------|------------------------------------------------------------------------------------------------------------------------------------------------------------------------------------------|------|------|-------------|-------|
|                     |                  | C: 11        |                               |   | Placebo (6.3-7.8 ml/kg)        |                                                                                                                                                                                          | 75   | -    |             |       |
| Loo, 2016 (64)      | Europe (Finland) | 38 (14/24)   | Untreated (pre-) hypertension | 8 | Chokeberry juice (300 ml/day)  | 100% chokeberry juice mixed with oven-dried chokeberry powder.<br>Energy: 76 kcal<br>Polyphenols: 2194 mg<br>Anthocyanins: 1024 mg<br>ProAnthocyanidins: 745 mg<br>Phenolic Acid: 367 mg | 55.8 | 25.9 | BP,BW,LP,GP | CO-SB |
|                     |                  |              |                               |   | Placebo (300 ml/day)           |                                                                                                                                                                                          |      |      |             |       |
| Lynn (I), 2012 (65) | Europe (UK)      | I: 24 (8/16) | Healthy subjects              | 4 | Pomegranate juice (330 ml/day) | 100% pomegranate juice.<br>Energy: 40 kcal/100 ml<br>Carbohydrate: 10 g/100 ml<br>Polyphenols: 18.6 mmol/l<br>Potassium: 1.711 mg/l                                                      | 36.1 | 25.0 | AS,BP,BW    | PA    |
|                     |                  | C: 24 (8/16) |                               |   | Control drink (330 ml/day)     |                                                                                                                                                                                          |      |      |             |       |

|                         |                |                                                   |                    |   |                                |                                                                                                                                                                                                                                                                                        |      |      |          |       |
|-------------------------|----------------|---------------------------------------------------|--------------------|---|--------------------------------|----------------------------------------------------------------------------------------------------------------------------------------------------------------------------------------------------------------------------------------------------------------------------------------|------|------|----------|-------|
| Lynn (II), 2014<br>(66) | Europe<br>(UK) | I: 25 (9/16)                                      | Healthy subjects   | 6 | Tart cherry juice (250 ml/day) | Montmorency tart cherry concentrate (30 ml) diluted with water (220 ml) (commercially available).<br>Energy: 102 kcal<br>Carbohydrate: 24.5 g.<br>Protein: 1.1 g<br>Fibre: 2.6 g<br>Fat: trace<br>Anthocyanins: 273.5 mg<br>Vitamin C: 9.72 mg<br>B-carotene: 408 mcg<br>Sodium: trace | 38.3 | 24.6 | AS,BP,LP | PA    |
|                         |                | C: 21 (8/13)                                      |                    |   | Control drink (250 ml/day)     |                                                                                                                                                                                                                                                                                        | 37.2 | 23.5 |          |       |
| Moazzen, 2017<br>(67)   | Asia<br>(Iran) | 32 (14/18)<br>[30 included in the final analysis) | Metabolic syndrome | 1 | Pomegranate juice (500 ml/day) | 100% pomegranate juice.<br>Polyphenols: 69 mg/l<br>Anthocyanins: 100.46 mg/l.<br>Flavonoids: 283.02 mg/l                                                                                                                                                                               | 51.6 | -    | BP,LP,GP | CO-DB |
|                         |                |                                                   |                    |   | Placebo (500 ml/day)           |                                                                                                                                                                                                                                                                                        |      |      |          |       |

|                   |                        |             |                         |   |                                                      |                                                                                                                                                                                                                                                                                                         |      |      |          |       |
|-------------------|------------------------|-------------|-------------------------|---|------------------------------------------------------|---------------------------------------------------------------------------------------------------------------------------------------------------------------------------------------------------------------------------------------------------------------------------------------------------------|------|------|----------|-------|
| Morand, 2011 (68) | Europe (France)        | 24 (24/0)   | Overweight participants | 4 | Orange juice (500 ml/day)                            | Orange juice from concentrate.<br>Energy: 194 kcal<br>Total Carbohydrates: 45 g (50% sucrose, 25% glucose, 25% fructose)<br>Flavonoids: 341.9 mg (Hesperidin: 292 mg, Narirutin: 47.5 mg)<br>Vitamin C: 180 mg<br>$\alpha$ -tocopherol: 1.05 mg<br>Vitamin B-9: 0.085 mg<br>Total carotenoids: 0.135 mg | 56   | 27.4 | BP,LP,GP | CO    |
|                   |                        |             |                         |   | Placebo (500 ml/day)                                 |                                                                                                                                                                                                                                                                                                         |      |      |          |       |
| Neto, 2017 (69)   | South America (Brazil) | I: 14 (5/9) | Hypertension            | 4 | (red) Grape juice (men 150 ml/day –women 100 ml/day) | 100% red grape juice                                                                                                                                                                                                                                                                                    | 50.5 | 25.5 | BP       | PA-DB |
|                   |                        | C: 12 (4/8) |                         |   | Control drink (not specified)                        |                                                                                                                                                                                                                                                                                                         | 53.3 | 26.5 |          |       |

|                     |                        |               |                                                    |   |                                         |                                                                                                                                                                                                                                 |      |      |          |       |
|---------------------|------------------------|---------------|----------------------------------------------------|---|-----------------------------------------|---------------------------------------------------------------------------------------------------------------------------------------------------------------------------------------------------------------------------------|------|------|----------|-------|
| Novotny, 2015 (70)  | North America (USA)    | I: 29 (14/15) | Healthy subjects                                   | 8 | Cranberry juice (480 ml/day)            | Cranberries juice (commercially available).<br>Energy: 40 kcal<br>Sugars: 6.5 (Sucrose: 0.1 g, Fructose: 4.6, Dextrose: 1.8 g)<br>Polyphenols: 173 mg<br>Anthocyanins: 10.3 mg<br>ProAnthocyanidins: 118 mg<br>Vitamin C: 60 mg | 49.8 | 27.8 | BP,LP,GP | PA-DB |
|                     |                        | C: 27 (12/15) |                                                    |   | Placebo (480 ml/day)                    |                                                                                                                                                                                                                                 | 51.3 | 29.1 |          |       |
| Paquette, 2017 (71) | North America (Canada) | I: 20 (9/11)  | Overweight/obese and insulin resistant individuals | 6 | Strawberry-cranberry juice (120 ml/day) | Dry strawberry and cranberry polyphenol extracts with water and sucralose.<br>Polyphenols: 333 mg<br>ProAnthocianidins: 20040 mcg/120 ml                                                                                        | 57   | 31   | BP,BW,LP | PA-DB |
|                     |                        | C: 21 (9/12)  |                                                    |   | Placebo (120 ml/day)                    |                                                                                                                                                                                                                                 | 60   | 31   |          |       |
| Park, 2009 (72)     | Asia (Korea)           | I: 21 (21/0)  | (Pre-) Hypertension                                | 8 | Grape Juice (5.5ml/kg/day)              | Grape juice.<br>Polyphenols: 2108 mg/l                                                                                                                                                                                          | 43   | 26.5 | BP,BW,LP | PA-DB |
|                     |                        | C: 19 (19/0)  |                                                    |   | Placebo (5.5 ml/kg/day)                 |                                                                                                                                                                                                                                 | 46   | 26.2 |          |       |

|                    |                        |              |                             |    |                                   |                                                                                                                                                                                                                                                             |      |      |                     |       |
|--------------------|------------------------|--------------|-----------------------------|----|-----------------------------------|-------------------------------------------------------------------------------------------------------------------------------------------------------------------------------------------------------------------------------------------------------------|------|------|---------------------|-------|
| Ruel, 2013 (73)    | North America (Canada) | 35 (35/0)    | Healthy overweight subjects | 4  | Cranberry juice (500 ml/day)      | 27% cranberry juice with water and sucralose (commercially available).<br>Energy: 22 kcal/125 ml<br>Carbohydrates: 5.46 g/125 ml<br>Polyphenols: 100 mg/125 ml<br>Anthocyanins: 5.2 mg/100 ml<br>ProAnthocyanidins: 74 mg/125 ml<br>Vitamin C: 32 mg/125 ml | 45   | 28.3 | BP                  | CO-DB |
|                    |                        |              |                             |    | Placebo (500 ml/day)              |                                                                                                                                                                                                                                                             |      |      |                     |       |
| Shidfar, 2012 (74) | Asia (Iran)            | I: 29 (29/0) | Type 2 diabetes patients    | 12 | Cranberry juice (240 ml/day)      | 100% Cranberry juice                                                                                                                                                                                                                                        | 54.8 | 29.1 | GP                  | PA-DB |
|                    |                        | C: 29 (29/0) |                             |    | Placebo (240 ml/day)              |                                                                                                                                                                                                                                                             |      |      |                     |       |
| Siasos, 2014 (75)  | Europe (Greece)        | 26 (10/16)   | Healthy smokers             | 2  | Concord grape juice (7 ml/kg/day) | 100% concord grape juice (commercially available).<br>Energy: 160 kcal/240 ml<br>Sugars: 39 g/240 ml (52% Fructose, 48% Glucose)<br>Polyphenols: 472.8 mg/240 ml<br>Anthocyanins: 296 mcmol/l / 240 ml                                                      | 26.3 | 23.2 | AS,BP,BW,LP, GP,FMD | CO-DB |
|                    |                        |              |                             |    | Placebo (7 ml/kg/day)             |                                                                                                                                                                                                                                                             |      |      |                     |       |

|                                        |                     |              |                                                  |    |                                |                                                                                                                                                  |      |      |             |       |
|----------------------------------------|---------------------|--------------|--------------------------------------------------|----|--------------------------------|--------------------------------------------------------------------------------------------------------------------------------------------------|------|------|-------------|-------|
| Silver, 2011 (76)                      | North America (USA) | I: 28 (3/25) | Obese subjects (BMI: 30-39.9 kg/m <sup>2</sup> ) | 12 | Grapefruit juice (≈121 ml/day) | 100% grapefruit juice.<br>Energy: 46 kcal<br>Fibre: 0.13 g<br>Flavonoid (Naringin): 39.6 mg<br>Vitamin C: 48.3 mg                                | 39.8 | 35.2 | BP,BW,LP,GP | PA    |
|                                        |                     | C: 28 (7/21) |                                                  |    | Water (≈127 g ml/day)          |                                                                                                                                                  | 38.7 | 35.7 |             |       |
| Simpson, 2016 (77)                     | Europe (UK)         | I: 18 (18/0) | Overweight/obese, hypercholesterolemic subjects  | 12 | Orange juice (250 ml/day)      | 100% orange juice.<br>Sucrose: 10.78 g<br>Fructose: 5.60 g<br>Glucose: 5.25 g<br>Hesperidin: 135.4 mg<br>Narirutin: 15.5 mg<br>Vitamin C: 137 mg | 48.3 | 29.9 | BW,LP,GP    | PA-SB |
|                                        |                     | C: 18 (18/0) |                                                  |    | Placebo (250 ml/day)           |                                                                                                                                                  | 48.9 | 29.3 |             |       |
| Sohrab (I), 2014 (78) & (II) 2015 (79) | Asia (Iran)         | 22 (11/11)   | Type 2 diabetes (without insulin as medication)  | 12 | Pomegranate juice (250 ml/day) | Pomegranate juice.<br>Energy: 126 kcal<br>Sugars: 24 g<br>Protein: 1.4 g<br>Fibre: 0 g<br>Polyphenols: 1946 mg/l<br>Flavonoids: 345.87 mcg/ml    | 55   | 29.4 | BW,GP       | PA-DB |
|                                        |                     | 22 (11/11)   |                                                  |    | Placebo (250 ml/day)           |                                                                                                                                                  | 56.9 | 28.6 |             |       |



|                      |                        |              |                                                    |    |                                   |                                                                                                                                                                                                                              |      |      |             |       |
|----------------------|------------------------|--------------|----------------------------------------------------|----|-----------------------------------|------------------------------------------------------------------------------------------------------------------------------------------------------------------------------------------------------------------------------|------|------|-------------|-------|
| Sumner, 2005<br>(80) | North America<br>(USA) | I: 26 (22/4) | Coronary heart disease                             | 13 | Pomegranate juice<br>(240 ml/day) | Pomegranate juice<br>(commercially available).<br>Energy: 160 kcal<br>Carbohydrate: 39 g<br>Sugars: 34 g<br>Fibre: -<br>Protein: -<br>Fats: -<br>Potassium: 550 mg<br>Sodium: 5 mg                                           | 69   | 28   | BP,BW,LP,GP | PA-DB |
|                      |                        | C: 19 (18/1) |                                                    |    | Placebo (240 ml/day)              |                                                                                                                                                                                                                              | 69   | 29   |             |       |
| Tsang, 2012 (81)     | Europe<br>(UK)         | 28 (12/16)   | Apparently healthy<br>overweight/obese<br>subjects | 4  | Pomegranate juice<br>(500 ml/day) | 100% pomegranate<br>juice.<br>Energy: 15 kcal/100<br>ml<br>Carbohydrate: 3.4<br>g/100 ml<br>Sugars: 3.4 g/100 ml<br>Protein: 0.1 gr/100ml<br>Fats: -<br>Polyphenols: 1685<br>mg/l<br>Vitamin C: 20<br>mg/100 ml<br>Sodium: - | 50.4 | 26.8 | AS,BP,LP,GP | CO    |
|                      |                        |              |                                                    |    | Placebo (500 ml/day)              |                                                                                                                                                                                                                              |      |      |             |       |

AS: arterial stiffness, BP: blood pressure, BW: body weight, C: control group, CO: cross-over, DB: double-blind, FMD: flow-mediated dilation, GP: glucose profile, I: intervention group, LP: lipids profile, PA: parallel-arm, SB: single-blind.

## Supplemental Table 7. Studies excluded after qualitative analysis

1. Aghababae SK et al. *Res Med Sci* 2015, 20(7):684-691.
2. Banini AE et al. *Nutrition*. 2006 Nov-Dec;22(11-12):1137-45.
3. Lima ACD et al. *J Med Food*. 2019 Feb;22(2):202-210. doi: 10.1089/jmf.2018.0080
4. Ribeiro C et al. *Nutrition* 2017, 38;13-19
5. Ravn-Haren G et al. *Eur J Nutr* 2013, 52:1875-1889
6. Sohrab G et al. *Clinical Nutrition ESPEN* 2019, 29:30-35
7. Zare Javid A et al. *J Am Coll Nutr*. 2018 Jan;37(1):71-79. doi: 10.1080/07315724.2017.1357509.
8. Cesar TB et al. *Nutr Res*. 2010 Oct;30(10):689-94. doi: 10.1016/j.nutres.2010.09.006.
9. Aviram M et al. *Clin Nutr* 2004;23:423-33
10. Stein JH et al. *Circulation*. 1999 Sep 7;100(10):1050-5
11. Lazavi F et al. *Complementary Therapies in Clinical Practice* 2018, 31:170-174
12. Asgary S et al. *Phytother Res* 2014,28:193-199
13. Leelarungrayub J et al. *Clin Interv Aging*. 2016 Aug 31;11:1183-92. doi: 10.2147/CIA.S110718
14. Toth PP et al. *Front Pharmacol*. 2016 Jan 6;6:299. doi: 10.3389/fphar.2015.00299
15. Mulero J et al. *Clin Nutr*. 2012 Jun;31(3):372-7. doi: 10.1016/j.clnu.2011.11.014
16. Díaz-Juárez JA et al. *Phytother Res* 2009, 23:948–54
17. Kardum N et al. *J Med Food* 00 (0) 2015, 1–8. doi: 10.1089/jmf.2014.0171
18. Poreba M et al. *Ann Agric Environ Med*. 2009;16(2):305-8.
19. Chou EJ et al. *Am J Cardiol*. 2001 Sep 1;88(5):553-5.
20. Johnson SA et al. *J Acad Nutr Diet* 2015;115:369-377. <http://dx.doi.org/10.1016/j.jand.2014.11.001>

21. Ellinger S et al. *J Agric Food Chem*. 2012 Nov 14;60(45):11292-300. doi: 10.1021/jf300719t
22. Amagase H et al. *Nutrition Research* 29 2009, 19–25. doi:10.1016/j.nutres.2008.11.005
23. Duthie SJ et al. *Eur J Nutr* (2018) 57:1855–1872. <https://doi.org/10.1007/s00394-017-1469-0>
24. Hollands WJ et al. *British Journal of Nutrition* 2018, 119:415-421.
25. Kent K et al. *Eur J Nutr* 2017,56:333-341.
26. Sweazea KL et al. *J Nutr Metab*. 2018 Sep 16;2018:1729653. doi: 10.1155/2018/1729653
27. Soriano-Maldonado A et al. *Eur J Nutr* 2014, 53:1645–1657. doi 10.1007/s00394-014-0670-7
28. Guo C et al. *Nutrition Research* 28 (2008) 72–77. doi:10.1016/j.nutres.2007.12.001
29. Bub A et al. *Journal of Nutritional Biochemistry* 14 (2003) 90–98.
30. Razani Z et al. *Phytother Res* 2017,31:1731-1738.
31. Mathison BD et al. *Nutr Res*. 2014 May;34(5):420-7. doi: 10.1016/j.nutres.2014.03.006.
32. Kunz S et al. *British Journal of Nutrition* 2014, 112, 925–936. doi:10.1017/S0007114514001482
33. Chai SC et al. *Nutrients* 2019, 11, 228; doi:10.3390/nu11020228
34. Shema-Didi L et al. *Free Radical Biology and Medicine* 2012, 53:297-304.
35. Sohrab G et al. *Metab Syndr Relat Disord*. 2018 Oct;16(8):446-451
36. Iso H, Kubota Y. *Asian Pac J Cancer Prev* 2007;(Suppl 8):35–80.
37. Oyebode O et al. *J Epidemiol Community Health* 2014,68:856-862.
38. Pase MP et al. *Appetite* 84 (2015) 68–72. <http://dx.doi.org/10.1016/j.appet.2014.09.019>
39. Apteckmann NP et al. *Lipids Health Dis*. 2013 Aug 6;12:119. doi: 10.1186/1476-511X-12-119.
40. Oude Griep LM et al. *Am J Clin Nutr* 2013;97:1083–91.013
41. Eshak ES et al. *Clinical Nutrition* 32 (2013) 300-308. <http://dx.doi.org/10.1016/j.clnu.2012.08.003>

42. Johnsen SP et al. Am J Clin Nutr 2003,78:57-64.
43. Oude Griep LM et al. PLoS ONE 2010,5(10):e13609.
44. Oude Griep LM et al. Eur J Clin Nutr 2011,65:791-799.
45. Shema-Didi L. et al. Nutrition Journal 2014, 13:18.
46. Reshef N et al. Am J Hypertens. 2005 Oct;18(10):1360-3.
47. Costans J et al. Clinical Nutrition 2015, 34,1093-1100.
48. Habauzit V et al. Am J Clin Nutr 2015; 102:66-72.
49. Tjelle T et al. British Journal of Nutrition 2015,114:1054-63.
50. Pokimika B et al. Nutrients. 2019 Apr 15;11(4). pii: E850. doi: 10.3390/nu11040850

**Supplemental Table 8. Subgroup analysis and meta-regression analysis of the effect of fruit juice consumption on blood pressure (RCTs)**

| <b>A. Systolic Blood Pressure</b> |                                         |                                        |                 |                          |
|-----------------------------------|-----------------------------------------|----------------------------------------|-----------------|--------------------------|
|                                   | <b>Variables<br/>(n. of cohorts)</b>    | <b>Mean<br/>Difference<br/>(mm Hg)</b> | <b>95% CI</b>   | <b>P for interaction</b> |
| <b>Study design</b>               | Cross-over (9)                          | -3.47                                  | -5.42 to -1.51  | 0.51                     |
|                                   | Parallel-arm (17)                       | -2.69                                  | -4.54 to -0.85  |                          |
| <b>Type of blinding</b>           | Double-blind (17)                       | -3.59                                  | -5.61 to -1.56  | 0.85                     |
|                                   | Single-blind (2)                        | -2.89                                  | -5.95 to 0.17   |                          |
|                                   | Open-label (7)                          | -2.81                                  | -4.81 to -0.81  |                          |
| <b>Risk factors</b>               | Healthy (9)                             | -3.77                                  | -6.08 to -1.46  | 0.44                     |
|                                   | Overweight/obese (4)                    | -1.51                                  | -4.28 to 1.25   |                          |
|                                   | With cardio-metabolic risk factors (10) | -3.70                                  | -5.63 to -1.77  |                          |
|                                   | At high cardiovascular risk (3)         | 0.56                                   | -7.58 to 8.71   |                          |
| <b>Type of Juice</b>              | Pomegranate Juice (5)                   | -5.25                                  | -7.60 to -2.90  | 0.56                     |
|                                   | Cranberry Juice (5)                     | -3.03                                  | -7.51 to 1.45   |                          |
|                                   | Grape Juice (5)                         | -0.89                                  | -5.25 to 3.47   |                          |
|                                   | Blackcurrant Juice (2)                  | 4.59                                   | -4.45 to 13.63  |                          |
|                                   | Cherry Juice (2)                        | -3.67                                  | -8.05 to 0.71   |                          |
|                                   | Strawberry Juice (1)                    | 2.20                                   | -12.11 to 16.51 |                          |
|                                   | Blueberry Juice (1)                     | -5.80                                  | -13.25 to 1.65  |                          |
|                                   | Chokeberry Juice (1)                    | -2.30                                  | -5.65 to 1.05   |                          |
|                                   | Bayberry Juice (1)                      | -4.00                                  | -11.84 to 3.84  |                          |
|                                   | Orange Juice (1)                        | -3.00                                  | -8.29 to 2.29   |                          |
|                                   | Grapefruit Juice (1)                    | -1.60                                  | -5.28 to 2.08   |                          |
| Mix Juice (1)                     | 2.00                                    | -10.54 to 14.54                        |                 |                          |
| <b>Comparator</b>                 | Placebo (19)                            | -3.37                                  | -5.01 to -1.73  | 0.74                     |
|                                   | Water (4)                               | -2.00                                  | -5.16 to 1.17   |                          |
|                                   | Other control drink (3)                 | -3.36                                  | -6.15 to -0.57  |                          |

|                                                             |                                |        |                 |      |
|-------------------------------------------------------------|--------------------------------|--------|-----------------|------|
| <b>Fruit Juice energy content compared to control drink</b> | Iso-caloric (19)               | -3.58  | -5.02 to -2.14  | 0.40 |
|                                                             | Hyper-caloric (6)              | -1.28  | -4.27 to 1.71   |      |
|                                                             | Unspecified (1)                | -2.60  | -15.30 to 10.10 |      |
| <b>Diet during trial</b>                                    | Usual (15)                     | -3.76  | -5.39 to -2.13  | 0.13 |
|                                                             | Without confounder sources (9) | -1.54  | -4.23 to 1.15   |      |
|                                                             | Controlled diet (1)            | -11.30 | -20.32 to -2.28 |      |
|                                                             | Restricted energy intake (1)   | -1.60  | -5.28 to 2.08   |      |
| <b>Country of origin</b>                                    | Noth America (13)              | -1.99  | -4.22 to 0.24   | 0.18 |
|                                                             | Europe (9)                     | -2.70  | -4.59 to -0.82  |      |
|                                                             | East Asia (2)                  | -3.92  | -10.95 to 3.11  |      |
|                                                             | Asia-Middle East (1)           | -6.94  | -10.27 to -3.61 |      |
|                                                             | South America (1)              | -2.60  | -15.30 to 10.10 |      |
| <b>Reconstituted Fruit Juice</b>                            | Yes (14)                       | -2.54  | -4.44 to -0.64  | 0.40 |
|                                                             | No (12)                        | -3.65  | -5.41 to -1.89  |      |

| <b>B. Systolic Blood Pressure</b>                     |                    |               |          |
|-------------------------------------------------------|--------------------|---------------|----------|
| <b>Variables</b> (n. of cohorts)                      | <b>Coefficient</b> | <b>95% CI</b> |          |
| <b>Age (years) (26)</b>                               | -.0128715          | -.1684479     | .1427049 |
| <b>BMI (Kg/m<sup>2</sup>) (24)</b>                    | .0785245           | -.259822      | .416871  |
| <b>Length of intervention (week) (26)</b>             | .3325463           | -.0353023     | .7003949 |
| <b>Number of participants (n) (26)</b>                | .0678393           | -.0476276     | .1833062 |
| <b>Gender (% men) (26)</b>                            | .0232193           | -.0379473     | .084386  |
| <b>Year of publication (year) (26)</b>                | -.4346865          | -.9601755     | .0908025 |
| <b>Volume of Fruit Juice (ml/day) (26)</b>            | -.0006617          | -.0094829     | .0081595 |
| <b>Baseline systolic blood pressure (mm Hg) (24)</b>  | -.0570601          | -.2110391     | .096919  |
| <b>Baseline diastolic blood pressure (mm Hg) (24)</b> | -.1410262          | -.3325957     | .0505434 |
| <b>Risk of bias (point) (26)</b>                      | .5399205           | -1.441215     | 2.521056 |

| <b>C. Diastolic Blood Pressure</b>                              |                                         |                                        |                |                          |
|-----------------------------------------------------------------|-----------------------------------------|----------------------------------------|----------------|--------------------------|
|                                                                 | <b>Variables<br/>(n. of cohorts)</b>    | <b>Mean<br/>Difference<br/>(mm Hg)</b> | <b>95% CI</b>  | <b>P for interaction</b> |
| <b>Study design</b>                                             | Cross-over (9)                          | -1.44                                  | -3.57 to 0.69  | 0.49                     |
|                                                                 | Parallel-arm (17)                       | -2.21                                  | -3.61 to -0.82 |                          |
| <b>Type of blinding</b>                                         | Double-blind (17)                       | -0.90                                  | -2.64 to 0.84  | 0.03                     |
|                                                                 | Single-blind (2)                        | -0.71                                  | -4.51 to 3.09  |                          |
|                                                                 | Open-label (7)                          | -3.33                                  | -5.10 to -1.55 |                          |
| <b>Risk factors</b>                                             | Healthy (9)                             | -2.94                                  | -4.76 to -1.13 | 0.09                     |
|                                                                 | Overweight/obese (4)                    | -2.69                                  | -5.93 to 0.54  |                          |
|                                                                 | With cardio-metabolic risk factors (10) | -0.51                                  | -2.65 to 1.63  |                          |
|                                                                 | At high cardiovascular risk (3)         | 1.36                                   | -3.11 to 5.83  |                          |
| <b>Type of Juice</b>                                            | Pomegranate Juice (5)                   | -2.87                                  | -5.38 to -0.36 | 0.09                     |
|                                                                 | Cranberry Juice (5)                     | -0.78                                  | -5.08 to 3.52  |                          |
|                                                                 | Grape Juice (5)                         | 0.90                                   | -2.55 to 4.34  |                          |
|                                                                 | Blackcurrant Juice (2)                  | 2.47                                   | -7.19 to 12.13 |                          |
|                                                                 | Cherry Juice (2)                        | -2.54                                  | -5.94 to 0.86  |                          |
|                                                                 | Strawberry Juice (1)                    | -1.10                                  | -8.35 to 6.15  |                          |
|                                                                 | Blueberry Juice (1)                     | -3.20                                  | -7.71 to 2.31  |                          |
|                                                                 | Chokeberry Juice (1)                    | 0.80                                   | -1.47 to 3.07  |                          |
|                                                                 | Bayberry Juice (1)                      | 0.10                                   | -5.19 to 5.39  |                          |
|                                                                 | Orange Juice (1)                        | -5.50                                  | -9.03 to -1.97 |                          |
|                                                                 | Grapefruit Juice (1)                    | -3.90                                  | -8.41 to 0.61  |                          |
| <b>Comparator</b>                                               | Mix Juice (1)                           | 0.00                                   | -8.23 to 8.23  | 0.66                     |
|                                                                 | Placebo (19)                            | -1.34                                  | -3.05 to 0.37  |                          |
|                                                                 | Water (4)                               | -2.00                                  | -5.57 to 1.57  |                          |
| <b>Fruit Juice energy content<br/>compared to control drink</b> | Other control drink (3)                 | -2.49                                  | -4.37 to -0.62 | 0.69                     |
|                                                                 | Iso-caloric (19)                        | -1.73                                  | -3.19 to -0.28 |                          |
|                                                                 | Hyper-caloric (6)                       | -1.92                                  | -4.76 to 0.93  |                          |
| <b>Diet during trial</b>                                        | Unspecified (1)                         | 2.20                                   | -7.21 to 11.61 | 0.05                     |
|                                                                 | Usual (15)                              | -1.66                                  | -3.21 to -0.12 |                          |



|                                  |                                |       |                 |      |
|----------------------------------|--------------------------------|-------|-----------------|------|
|                                  | Without confounder sources (9) | -0.71 | -2.74 to 1.32   |      |
|                                  | Controlled diet (1)            | -8.20 | -13.30 to -3.10 |      |
|                                  | Restricted energy intake (1)   | -3.90 | -8.41 to 0.61   |      |
| <b>Country of origin</b>         | Noth America (13)              | -1.14 | -3.03 to 0.75   |      |
|                                  | Europe (9)                     | -1.91 | -4.18 to 0.36   |      |
|                                  | East Asia (2)                  | -0.45 | -5.29 to 4.40   | 0.31 |
|                                  | Asia-Middle East (1)           | -4.00 | -6.35 to -1.65  |      |
|                                  | South America (1)              | 2.20  | -7.21 to 11.61  |      |
| <b>Reconstituted Fruit Juice</b> | Yes (14)                       | -1.33 | -2.61 to -0.05  | 0.23 |
|                                  | No (12)                        | -2.45 | -3.75 to -1.16  |      |

| <b>D. Diastolic Blood Pressure</b>                    |                    |               |          |
|-------------------------------------------------------|--------------------|---------------|----------|
| <b>Variables</b> (n. of cohorts)                      | <b>Coefficient</b> | <b>95% CI</b> |          |
| <b>Age (years) (26)</b>                               | .0125207           | -.1256053     | .1506467 |
| <b>BMI (Kg/m<sup>2</sup>) (24)</b>                    | -.028484           | -.3786708     | .3217027 |
| <b>Length of intervention (week) (26)</b>             | .2442633           | -.1359238     | .6244504 |
| <b>Number of participants (n) (26)</b>                | .0208782           | -.0949261     | .1366825 |
| <b>Gender (% men) (26)</b>                            | -.0018935          | -.0552538     | .0514669 |
| <b>Year of publication (year) (26)</b>                | .0520775           | -.4915935     | .5957484 |
| <b>Volume of Fruit Juice (ml/day) (26)</b>            | -.0000815          | -.0096185     | .0094555 |
| <b>Baseline systolic blood pressure (mm Hg) (24)</b>  | -.0381115          | -.1976627     | .1214397 |
| <b>Baseline diastolic blood pressure (mm Hg) (24)</b> | -.0893083          | -.3175527     | .1389361 |
| <b>Risk of bias (point) (26)</b>                      | -.1527052          | -1.695538     | 1.390128 |

**Supplemental Table 9. Subgroup analysis and meta-regression analysis of the effect of fruit juice consumption on body weight**

| <b>A. Weight</b>                                            |                                         |                                     |                 |                          |
|-------------------------------------------------------------|-----------------------------------------|-------------------------------------|-----------------|--------------------------|
|                                                             | <b>Variables<br/>(n. of cohorts)</b>    | <b>Mean<br/>Difference<br/>(Kg)</b> | <b>95% CI</b>   | <b>P for interaction</b> |
| <b>Study design</b>                                         | Cross-over (5)                          | 0.00                                | -0.44 to 0.44   | 0.66                     |
|                                                             | Parallel-arm (15)                       | -0.15                               | -0.61 to 0.32   |                          |
| <b>Type of blinding</b>                                     | Double-blind (14)                       | -0.01                               | -0.45 to 0.43   | 0.27                     |
|                                                             | Single-blind (2)                        | -0.70                               | -1.55 to 0.15   |                          |
|                                                             | Open-label (4)                          | 0.11                                | -0.46 to 0.67   |                          |
| <b>Risk factors</b>                                         | Healthy (6)                             | 0.07                                | -2.65 to 2.80   | 0.29                     |
|                                                             | Overweight/obese (4)                    | -0.70                               | -1.55 to 0.14   |                          |
|                                                             | With cardio-metabolic risk factors (10) | 0.03                                | -0.31 to 0.38   |                          |
| <b>Type of Juice</b>                                        | Grape Juice (5)                         | -0.35                               | -4.72 to 4.01   | 0.97                     |
|                                                             | Pomegranate Juice (3)                   | -0.57                               | -8.40 to 7.27   |                          |
|                                                             | Blackcurrant Juice (2)                  | -0.27                               | -12.82 to 12.29 |                          |
|                                                             | Orange Juice (2)                        | -0.18                               | -1.77 to 1.41   |                          |
|                                                             | Mix Juice (2)                           | 0.82                                | -4.52 to 6.15   |                          |
|                                                             | Bilberry Juice (1)                      | 0.10                                | -0.47 to 0.67   |                          |
|                                                             | Cherry Juice (1)                        | -0.40                               | -9.20 to 8.40   |                          |
|                                                             | Strawberry Juice (1)                    | 0.10                                | -20.09 to 20.29 |                          |
|                                                             | Blueberry Juice (1)                     | -0.90                               | -1.90 to 0.10   |                          |
|                                                             | Chokeberry Juice (1)                    | -0.01                               | -0.45 to 0.44   |                          |
| <b>Comparator</b>                                           | Bayberry Juice (1)                      | -0.05                               | -3.58 to 3.48   | 0.70                     |
|                                                             | Placebo (17)                            | -0.02                               | -0.44 to 0.40   |                          |
| <b>Fruit Juice energy content compared to control drink</b> | Water (3)                               | -0.27                               | -1.03 to 0.50   | 0.91                     |
|                                                             | Iso-caloric (13)                        | -0.02                               | -0.44 to 0.41   |                          |
|                                                             | Hyper-caloric (6)                       | -0.14                               | -0.64 to 0.35   |                          |
| <b>Diet during trial</b>                                    | Unspecified (1)                         | -1.60                               | -15.59 to 12.39 | 0.45                     |
|                                                             | Usual (14)                              | -0.16                               | -0.55 to 0.23   |                          |
|                                                             | Without confounder sources (6)          | 0.10                                | -0.45 to 0.66   |                          |

|                                  |                      |       |                 |      |
|----------------------------------|----------------------|-------|-----------------|------|
| <b>Country of origin</b>         | Noth America (8)     | -0.87 | -1.84 to 0.10   | 0.56 |
|                                  | Europe (8)           | 0.03  | -0.31 to 0.37   |      |
|                                  | East Asia (2)        | -0.11 | -3.44 to 3.22   |      |
|                                  | Asia-Middle East (1) | 0.80  | -11.55 to 13.15 |      |
|                                  | South America (1)    | -1.60 | -15.59 to 12.39 |      |
| <b>Reconstituted Fruit Juice</b> | Yes (9)              | -0.06 | -0.39 to 0.27   | 0.86 |
|                                  | No (11)              | -0.19 | -1.55 to 1.17   |      |

| <b>B. Weight</b>                                    |                    |               |          |
|-----------------------------------------------------|--------------------|---------------|----------|
| <b>Variables</b> (n. of cohorts)                    | <b>Coefficient</b> | <b>95% CI</b> |          |
| <b>Age (years) (20)</b>                             | .0175886           | -.0604191     | .0955962 |
| <b>Length of intervention (week) (20)</b>           | -.0530894          | -.2215645     | .1153856 |
| <b>Number of participants (n) (20)</b>              | .0056812           | -.0404664     | .0518287 |
| <b>Gender (% men) (19)</b>                          | .007519            | -.0071001     | .022138  |
| <b>Year of publication (year) (20)</b>              | .0379438           | -.128567      | .2044546 |
| <b>Volume of Fruit Juice (ml/day) (20)</b>          | -.0028055          | -.0080116     | .0024007 |
| <b>Energy intake by Fruit Juice (Kcal/day) (11)</b> | -.0068712          | -.0179158     | .0041734 |
| <b>BMI (Kg/m<sup>2</sup>) (19)</b>                  | -.0779219          | -.1711375     | .0152938 |
| <b>Baseline weight (Kg) (18)</b>                    | -.0050476          | -.0897152     | .07962   |
| <b>Baseline waist circumference (cm) (7)</b>        | .002957            | -.1127288     | .1186429 |
| <b>Risk of bias (point) (20)</b>                    | .2748022           | -.10858       | .6581845 |

| <b>C. BMI</b>                                                   |                                        |                                 |               |                          |
|-----------------------------------------------------------------|----------------------------------------|---------------------------------|---------------|--------------------------|
|                                                                 | <b>Variables<br/>(n. of cohorts)</b>   | <b>Mean<br/>Difference (Kg)</b> | <b>95% CI</b> | <b>P for interaction</b> |
| <b>Study design</b>                                             | Cross-over (2)                         | -0.02                           | -0.18 to 0.13 | 0.91                     |
|                                                                 | Parallel-arm (11)                      | -0.04                           | -0.24 to 0.16 |                          |
| <b>Type of blinding</b>                                         | Double-blind (10)                      | -0.02                           | -0.18 to 0.13 | 0.94                     |
|                                                                 | Open-label (3)                         | -0.03                           | -0.24 to 0.17 |                          |
| <b>Risk factors</b>                                             | Healthy (5)                            | -0.06                           | -0.27 to 0.15 | 0.77                     |
|                                                                 | Overweight/obese (3)                   | 0.18                            | -0.47 to 0.83 |                          |
|                                                                 | With cardio-metabolic risk factors (5) | -0.02                           | -0.18 to 0.14 |                          |
| <b>Type of Juice</b>                                            | Pomegranate Juice (4)                  | -0.06                           | -0.27 to 0.16 | 0.99                     |
|                                                                 | Grape Juice (2)                        | -0.12                           | -1.35 to 1.11 |                          |
|                                                                 | Blackcurrant Juice (2)                 | -0.02                           | -3.92 to 3.89 |                          |
|                                                                 | Cherry Juice (1)                       | -0.10                           | -2.90 to 2.70 |                          |
|                                                                 | Chokeberry Juice (1)                   | -0.02                           | -0.18 to 0.14 |                          |
|                                                                 | Bayberry Juice (1)                     | -0.10                           | -1.08 to 0.88 |                          |
|                                                                 | Grapefruit Juice (1)                   | 0.20                            | -0.47 to 0.87 |                          |
| <b>Comparator</b>                                               | Mix Juice (1)                          | 0.00                            | -4.19 to 4.19 | 0.75                     |
|                                                                 | Placebo (10)                           | -0.02                           | -0.18 to 0.13 |                          |
|                                                                 | Water (2)                              | 0.21                            | -0.45 to 0.87 |                          |
| <b>Fruit Juice energy content<br/>compared to control drink</b> | Control drink (1)                      | -0.06                           | -0.28 to 0.16 | 0.75                     |
|                                                                 | Iso-caloric (8)                        | -0.04                           | -0.16 to 0.09 |                          |
|                                                                 | Hyper-caloric (4)                      | 0.20                            | -0.45 to 0.86 |                          |
| <b>Diet during trial</b>                                        | Unspecified (1)                        | -0.70                           | -5.89 to 4.49 | 0.79                     |
|                                                                 | Usual (10)                             | -0.03                           | -0.16 to 0.09 |                          |
|                                                                 | Without confounder sources (2)         | -0.09                           | -1.05 to 0.86 |                          |
| <b>Country of origin</b>                                        | Restricted energy intake (1)           | 0.20                            | -0.47 to 0.87 | 0.98                     |
|                                                                 | Noth America (4)                       | 0.13                            | -0.45 to 0.71 |                          |
|                                                                 | Europe (5)                             | -0.03                           | -0.16 to 0.09 |                          |
|                                                                 | East Asia (2)                          | -0.11                           | -1.03 to 0.81 |                          |
|                                                                 | Asia-Middle East (1)                   | 0.20                            | -3.33 to 3.73 |                          |

|                                  |                   |       |               |      |
|----------------------------------|-------------------|-------|---------------|------|
|                                  | South America (1) | -0.70 | -5.89 to 4.49 |      |
| <b>Reconstituted Fruit Juice</b> | Yes (5)           | -0.02 | -0.18 to 0.14 | 0.88 |
|                                  | No (8)            | -0.04 | -0.24 to 0.16 |      |

| <b>D. BMI</b>                                       |                    |               |          |
|-----------------------------------------------------|--------------------|---------------|----------|
| <b>Variables (n. of cohorts)</b>                    | <b>Coefficient</b> | <b>95% CI</b> |          |
| <b>Age (years) (20)</b>                             |                    |               |          |
| <b>Length of intervention (week) (13)</b>           | .0159788           | -.0471108     | .0790684 |
| <b>Number of participants (n) (13)</b>              | .0007242           | -.0248131     | .0262616 |
| <b>Gender (% men) (11)</b>                          | -.005415           | -.0340558     | .0232258 |
| <b>Year of publication (year) (13)</b>              | .0027863           | -.0666697     | .0722423 |
| <b>Volume of Fruit Juice (ml/day) (13)</b>          | -.0007267          | -.0033307     | .0018772 |
| <b>Energy intake by Fruit Juice (Kcal/day) (10)</b> | -.0007644          | -.004615      | .0030861 |
| <b>Baseline weight (Kg) (9)</b>                     | .0035414           | -.1126535     | .1197363 |
| <b>Baseline waist circumference (cm) (5)</b>        | -.000126           | -.049021      | .048769  |
| <b>Risk of bias (point) (13)</b>                    | -.1179087          | -1.517984     | 1.282166 |

| <b>E. Waist Circumference</b>                                   |                                        |                                     |                 |                          |
|-----------------------------------------------------------------|----------------------------------------|-------------------------------------|-----------------|--------------------------|
|                                                                 | <b>Variables<br/>(n. of cohorts)</b>   | <b>Mean<br/>Difference<br/>(cm)</b> | <b>95% CI</b>   | <b>P for interaction</b> |
| <b>Study design</b>                                             | Cross-over (1)                         | 0.00                                | -2.94 to 2.94   | 0.94                     |
|                                                                 | Parallel-arm (9)                       | 0.13                                | -1.00 to 1.25   |                          |
| <b>Type of blinding</b>                                         | Double-blind (5)                       | -0.09                               | -1.85 to 1.68   | 0.93                     |
|                                                                 | Single-blind (2)                       | 0.32                                | -1.17 to 1.81   |                          |
|                                                                 | Open-label (3)                         | -0.10                               | -2.78 to 2.58   |                          |
| <b>Risk factors</b>                                             | Healthy (2)                            | -0.12                               | -1.96 to 1.71   | 0.95                     |
|                                                                 | Overweight/obese (5)                   | 0.23                                | -1.06 to 1.52   |                          |
|                                                                 | With cardio-metabolic risk factors (3) | -0.29                               | -9.73 to 9.14   |                          |
| <b>Type of Juice</b>                                            | Pomegranate Juice (2)                  | 0.37                                | -7.68 to 8.41   | 1.0                      |
|                                                                 | Grape Juice (2)                        | -0.21                               | -2.53 to 2.11   |                          |
|                                                                 | Grapefruit Juice (1)                   | -0.10                               | -2.84 to 2.64   |                          |
|                                                                 | Bayberry Juice (1)                     | 0.00                                | -2.94 to 2.94   |                          |
|                                                                 | Orange Juice (1)                       | 0.50                                | -1.52 to 2.52   |                          |
|                                                                 | Strawberry Juice (1)                   | 3.30                                | -24.08 to 30.68 |                          |
|                                                                 | Blueberry Juice (1)                    | 0.10                                | -2.11 to 2.31   |                          |
| Mix Juice (1)                                                   | 0.00                                   | -10.51 to 10.51                     |                 |                          |
| <b>Comparator</b>                                               | Placebo (6)                            | 0.17                                | -1.16 to 1.50   | 0.89                     |
|                                                                 | Water (4)                              | 0.02                                | -1.69 to 1.73   |                          |
| <b>Fruit Juice energy content<br/>compared to control drink</b> | Iso-caloric (5)                        | 0.15                                | -1.19 to 1.49   | 0.98                     |
|                                                                 | Hyper-caloric (4)                      | 0.02                                | -1.69 to 1.73   |                          |
|                                                                 | Unspecified (1)                        | 1.00                                | -8.80 to 10.80  |                          |
| <b>Diet during trial</b>                                        | Usual (7)                              | 0.17                                | -1.06 to 1.41   | 0.98                     |
|                                                                 | Without confounder sources (2)         | 0.00                                | -2.83 to 2.83   |                          |
|                                                                 | Restricted energy intake (1)           | -0.10                               | -2.84 to 2.64   |                          |
| <b>Country of origin</b>                                        | Noth America (6)                       | -0.05                               | -1.42 to 1.32   | 0.97                     |
|                                                                 | Europe (2)                             | 0.47                                | -1.53 to 2.47   |                          |
|                                                                 | East Asia (1)                          | 0.00                                | -2.94 to 2.94   |                          |
|                                                                 | South America (1)                      | 1.00                                | -8.80 to 10.80  |                          |



|                                  |         |      |               |      |
|----------------------------------|---------|------|---------------|------|
| <b>Reconstituted Fruit Juice</b> | Yes (3) | 0.12 | -2.04 to 2.28 | 0.99 |
|                                  | No (7)  | 0.11 | -1.09 to 1.31 |      |

| <b>F. Waist Circumference</b>                      |  |                    |               |          |
|----------------------------------------------------|--|--------------------|---------------|----------|
| <b>Variables</b> (n. of cohorts)                   |  | <b>Coefficient</b> | <b>95% CI</b> |          |
| <b>Age (years) (10)</b>                            |  | .0131549           | -.0883796     | .1146894 |
| <b>Length of intervention (week) (10)</b>          |  | .0055537           | -.4106446     | .421752  |
| <b>Number of participants (n) (10)</b>             |  | -.0282404          | -.1872732     | .1307923 |
| <b>Gender (% men) (8)</b>                          |  | .0054742           | -.0311236     | .042072  |
| <b>Year of publication (year) (10)</b>             |  | .0584099           | -.4710099     | .5878297 |
| <b>Volume of Fruit Juice (ml/day) (10)</b>         |  | -.0007301          | -.0091208     | .0076605 |
| <b>Energy intake by Fruit Juice (Kcal/day) (6)</b> |  | -.0005418          | -.0170175     | .0159338 |
| <b>Baseline BMI (kg/m<sup>2</sup>) (9)</b>         |  | .0046407           | -.2710497     | .280331  |
| <b>Baseline weight (Kg) (7)</b>                    |  | .0239721           | -.1299303     | .1778745 |
| <b>Baseline waist circumference (cm) (8)</b>       |  | .0086716           | -.043332      | .0606752 |
| <b>Risk of bias (point) (10)</b>                   |  | .0803118           | -.8238818     | .9845053 |

**Supplemental Table 10. Subgroup analysis and meta-regression analysis of the effect of fruit juice consumption on lipid metabolic profile**

| <b>A. Total Cholesterol</b> |                                         |                                        |                 |                          |
|-----------------------------|-----------------------------------------|----------------------------------------|-----------------|--------------------------|
|                             | <b>Variables<br/>(n. of cohorts)</b>    | <b>Mean<br/>Difference<br/>(mg/dl)</b> | <b>95% CI</b>   | <b>P for interaction</b> |
| <b>Study design</b>         | Cross-over (8)                          | -1.84                                  | -6.83 to 3.15   | 0.50                     |
|                             | Parallel-arm (21)                       | -4.15                                  | -8.51 to 0.22   |                          |
| <b>Type of blinding</b>     | Double-blind (17)                       | -3.67                                  | -9.40 to 2.05   | 0.92                     |
|                             | Single-blind (3)                        | -1.87                                  | -8.74 to 4.99   |                          |
|                             | Open-label (9)                          | -3.42                                  | -8.37 to 1.52   |                          |
| <b>Risk factors</b>         | Healthy (8)                             | -4.65                                  | -11.83 to 2.52  | 0.97                     |
|                             | Overweight/obese (5)                    | -2.53                                  | -8.41 to 3.36   |                          |
|                             | With cardio-metabolic risk factors (15) | -2.94                                  | -7.72 to 1.84   |                          |
|                             | Other disease (1)                       | 0.24                                   | -41.51 to 41.99 |                          |
| <b>Type of Juice</b>        | Pomegranate Juice (6)                   | 1.66                                   | -8.73 to 12.05  | 0.95                     |
|                             | Cranberry Juice (5)                     | -0.84                                  | -12.97 to 11.30 |                          |
|                             | Grape Juice (4)                         | -1.43                                  | -12.70 to 9.84  |                          |
|                             | Cherry Juice (2)                        | -8.63                                  | -21.76 to 4.50  |                          |
|                             | Blackcurrant Juice (2)                  | 1.95                                   | -18.42 to 22.32 |                          |
|                             | Orange Juice (2)                        | 1.34                                   | -13.88 to 16.56 |                          |
|                             | Grapefruit Juice (1)                    | -5.70                                  | -12.72 to 1.32  |                          |
|                             | Bayberry Juice (1)                      | -12.00                                 | -26.31 to 2.31  |                          |
|                             | Bilberry Juice (1)                      | -5.79                                  | -18.65 to 7.07  |                          |
|                             | Strawberry Juice (1)                    | -19.30                                 | -57.13 to 18.53 |                          |
|                             | Blueberry Juice (1)                     | 0.00                                   | -27.24 to 27.24 |                          |
|                             | Chokeberry Juice (1)                    | -1.16                                  | -8.72 to 6.40   |                          |
|                             | Strawberry+Cranberry Juice (1)          | -6.95                                  | -37.98 to 24.08 |                          |

|                                                             |                                 |        |                 |      |
|-------------------------------------------------------------|---------------------------------|--------|-----------------|------|
|                                                             | Mix Juice (1)                   | -4.50  | -27.04 to 18.04 |      |
| <b>Comparator</b>                                           | Placebo (23)                    | -1.91  | -6.01 to 2.20   |      |
|                                                             | Water (5)                       | -5.11  | -10.99 to 0.77  | 0.59 |
|                                                             | Control drink (1)               | -7.07  | -22.20 to 8.06  |      |
| <b>Fruit Juice energy content compared to control drink</b> | Iso-caloric (19)                | -2.43  | -6.53 to 1.67   |      |
|                                                             | Hyper-caloric (9)               | -4.37  | -9.91 to 1.17   | 0.84 |
|                                                             | Unspecified (1)                 | -7.72  | -46.92 to 31.48 |      |
| <b>Diet during trial</b>                                    | Usual (17)                      | -1.98  | -6.83 to 2.87   |      |
|                                                             | Without confounder sources (10) | -3.85  | -9.99 to 2.29   |      |
|                                                             | Controlled diet (1)             | 3.09   | -14.35 to 20.53 | 0.73 |
|                                                             | Restricted energy intake (1)    | -5.70  | -12.72 to 1.32  |      |
| <b>Country of origin</b>                                    | Noth America (13)               | -4.21  | -9.39 to 0.96   |      |
|                                                             | Europe (13)                     | -1.19  | -5.92 to 3.55   |      |
|                                                             | East Asia (1)                   | -12.00 | -26.31 to 2.31  | 0.51 |
|                                                             | Asia-Middle East (2)            | -3.94  | -17.02 to 9.14  |      |
| <b>Reconstituted Fruit Juice</b>                            | Yes (14)                        | -2.56  | -7.33 to 2.20   |      |
|                                                             | No (15)                         | -3.68  | -8.21 to 0.85   | 0.74 |

| <b>B. Total Cholesterol</b>                         |                    |               |          |
|-----------------------------------------------------|--------------------|---------------|----------|
| <b>Variables</b> (n. of cohorts)                    | <b>Coefficient</b> | <b>95% CI</b> |          |
| <b>Age (years) (29)</b>                             | .2087322           | -.0957425     | .5132069 |
| <b>Length of intervention (week) (29)</b>           | -.1886155          | -1.180843     | .8036123 |
| <b>Number of participants (n) (29)</b>              | -.1477117          | -.437016      | .1415925 |
| <b>Gender (% men) (27)</b>                          | .0683026           | -.0594819     | .1960871 |
| <b>Year of publication (year) (29)</b>              | -.2083275          | -1.406807     | .9901524 |
| <b>Volume of Fruit Juice (ml/day) (29)</b>          | .0065875           | -.0113025     | .0244775 |
| <b>Energy intake by Fruit Juice (Kcal/day) (16)</b> | -.0003146          | -.0534269     | .0527978 |
| <b>Baseline BMI (kg/m<sup>2</sup>) (27)</b>         | -.2384758          | -1.03619      | .5592388 |
| <b>Baseline total cholesterol (mg/dl) (27)</b>      | -.0043634          | -.1456368     | .1369101 |
| <b>Baseline LDL-cholesterol (mg/dl) (21)</b>        | .1017191           | -.1258367     | .3292749 |
| <b>Baseline HDL-cholesterol (mg/dl) (24)</b>        | .1872147           | -.3189291     | .6933586 |
| <b>Baseline triglycerides (mg/dl) (24)</b>          | -.0224749          | -.1046788     | .059729  |
| <b>Risk of bias (point) (29)</b>                    | -.4889376          | -5.200919     | 4.223044 |

| <b>C. LDL-Cholesterol</b>                                       |                                         |                                        |                 |                          |
|-----------------------------------------------------------------|-----------------------------------------|----------------------------------------|-----------------|--------------------------|
|                                                                 | <b>Variables<br/>(n. of cohorts)</b>    | <b>Mean<br/>Difference<br/>(mg/dl)</b> | <b>95% CI</b>   | <b>P for interaction</b> |
| <b>Study design</b>                                             | Cross-over (7)                          | -1.23                                  | -6.79 to 4.33   | 0.53                     |
|                                                                 | Parallel-arm (16)                       | 0.87                                   | -2.55 to 4.29   |                          |
| <b>Type of blinding</b>                                         | Double-blind (14)                       | -2.40                                  | -7.33 to 2.53   | 0.41                     |
|                                                                 | Single-blind (2)                        | 2.89                                   | -8.88 to 14.67  |                          |
|                                                                 | Open-label (7)                          | 1.61                                   | -2.17 to 5.40   |                          |
| <b>Risk factors</b>                                             | Healthy (5)                             | -4.79                                  | -11.70 to 2.13  | 0.34                     |
|                                                                 | Overweight/obese (5)                    | 2.32                                   | -1.52 to 6.15   |                          |
|                                                                 | With cardio-metabolic risk factors (12) | -0.89                                  | -6.82 to 5.05   |                          |
|                                                                 | Other disease (1)                       | 3.33                                   | -32.34 to 39.00 |                          |
| <b>Type of Juice</b>                                            | Pomegranate Juice (6)                   | 1.23                                   | -7.85 to 10.30  | 0.63                     |
|                                                                 | Cranberry Juice (4)                     | -0.03                                  | -10.09 to 10.03 |                          |
|                                                                 | Grape Juice (4)                         | -0.78                                  | -11.89 to 10.32 |                          |
|                                                                 | Orange Juice (2)                        | 7.22                                   | -3.97 to 18.42  |                          |
|                                                                 | Cherry Juice (1)                        | -12.50                                 | -37.39 to 12.39 |                          |
|                                                                 | Grapefruit Juice (1)                    | 1.80                                   | -2.32 to 5.92   |                          |
|                                                                 | Bayberry Juice (1)                      | -8.20                                  | -17.61 to 1.21  |                          |
|                                                                 | Strawberry Juice (1)                    | -15.44                                 | -49.54 to 18.66 |                          |
|                                                                 | Blueberry Juice (1)                     | 3.86                                   | -12.80 to 20.52 |                          |
|                                                                 | Strawberry+Cranberry Juice (1)          | -6.95                                  | -33.43 to 19.53 |                          |
|                                                                 | Mix Juice (1)                           | -7.30                                  | -29.06 to 14.46 |                          |
| <b>Comparator</b>                                               | Placebo (19)                            | -1.13                                  | -5.43 to 3.17   | 0.38                     |
|                                                                 | Water (4)                               | 1.49                                   | -2.46 to 5.45   |                          |
| <b>Fruit Juice energy content<br/>compared to control drink</b> | Iso-caloric (16)                        | -1.07                                  | -5.47 to 3.32   | 0.69                     |
|                                                                 | Hyper-caloric (6)                       | 1.42                                   | -2.49 to 5.33   |                          |
|                                                                 | Unspecified (1)                         | -3.90                                  | -40.16 to 32.36 |                          |
| <b>Diet during trial</b>                                        | Usual (12)                              | 0.05                                   | -6.33 to 6.43   | 0.60                     |

|                                  |                                |       |                 |      |
|----------------------------------|--------------------------------|-------|-----------------|------|
|                                  | Without confounder sources (9) | -3.01 | -8.88 to 2.85   |      |
|                                  | Controlled diet (1)            | 2.70  | -10.92 to 16.32 |      |
|                                  | Restricted energy intake (1)   | 1.80  | -2.32 to 5.92   |      |
| <b>Country of origin</b>         | Noth America (12)              | 1.00  | -2.47 to 4.46   |      |
|                                  | Europe (8)                     | 1.78  | -6.23 to 9.80   | 0.32 |
|                                  | East Asia (1)                  | -8.20 | -17.61 to 1.21  |      |
|                                  | Asia-Middle East (2)           | 2.06  | -9.15 to 13.28  |      |
| <b>Reconstituted Fruit Juice</b> | Yes (8)                        | -0.21 | -7.72 to 7.30   | 0.89 |
|                                  | No (15)                        | 0.38  | -2.77 to 3.54   |      |

| <b>D. LDL-cholesterol</b>                           |                    |               |          |
|-----------------------------------------------------|--------------------|---------------|----------|
| <b>Variables</b> (n. of cohorts)                    | <b>Coefficient</b> | <b>95% CI</b> |          |
| <b>Age (years) (23)</b>                             | .1917848           | -.0982563     | .4818259 |
| <b>Length of intervention (week) (23)</b>           | .3310754           | -.4762682     | 1.138419 |
| <b>Number of participants (n) (23)</b>              | .0430864           | -.237066      | .3232387 |
| <b>Gender (% men) (21)</b>                          | .0576498           | -.0690479     | .1843475 |
| <b>Year of publication (year) (23)</b>              | -.7719624          | -1.983642     | .4397169 |
| <b>Volume of Fruit Juice (ml/day) (23)</b>          | -.0084995          | -.0245353     | .0075363 |
| <b>Energy intake by Fruit Juice (Kcal/day) (12)</b> | -.0190648          | -.069871      | .0317413 |
| <b>Baseline BMI (kg/m<sup>2</sup>) (21)</b>         | .3665378           | -.3596031     | 1.092679 |
| <b>Baseline total cholesterol (mg/dl) (21)</b>      | .0307062           | -.1363101     | .1977226 |
| <b>Baseline LDL-cholesterol (mg/dl) (21)</b>        | .1408803           | -.042515      | .3242757 |
| <b>Baseline HDL-cholesterol (mg/dl) (21)</b>        | -.0195197          | -.9533382     | .9142987 |
| <b>Baseline triglycerides (mg/dl) (21)</b>          | .005081            | -.0719627     | .0821247 |
| <b>Risk of bias (point) (23)</b>                    | .1522973           | -3.900806     | 4.205401 |

| <b>E. HDL-Cholesterol</b>                                       |                                         |                                        |                 |                          |
|-----------------------------------------------------------------|-----------------------------------------|----------------------------------------|-----------------|--------------------------|
|                                                                 | <b>Variables<br/>(n. of cohorts)</b>    | <b>Mean<br/>Difference<br/>(mg/dl)</b> | <b>95% CI</b>   | <b>P for interaction</b> |
| <b>Study design</b>                                             | Cross-over (7)                          | -0.91                                  | -2.18 to 0.36   | 0.02                     |
|                                                                 | Parallel-arm (18)                       | 1.55                                   | -0.05 to 3.16   |                          |
| <b>Type of blinding</b>                                         | Double-blind (14)                       | -0.01                                  | -1.97 to 1.94   | 0.002                    |
|                                                                 | Single-blind (3)                        | -0.73                                  | -1.92 to 0.47   |                          |
|                                                                 | Open-label (8)                          | 4.39                                   | 0.96 to 7.82    |                          |
| <b>Risk factors</b>                                             | Healthy (5)                             | 4.49                                   | -0.29 to 9.27   | 0.004                    |
|                                                                 | Overweight/obese (5)                    | 3.59                                   | 0.11 to 7.07    |                          |
|                                                                 | With cardio-metabolic risk factors (14) | -0.68                                  | -1.73 to 0.37   |                          |
|                                                                 | Other disease (1)                       | -2.31                                  | -21.91 to 17.29 |                          |
| <b>Type of Juice</b>                                            | Pomegranate Juice (6)                   | -0.61                                  | -3.38 to 2.15   | 0.06                     |
|                                                                 | Cranberry Juice (4)                     | -0.06                                  | -3.94 to 3.82   |                          |
|                                                                 | Grape Juice (3)                         | 1.35                                   | -3.43 to 6.13   |                          |
|                                                                 | Orange Juice (2)                        | 0.00                                   | -3.38 to 3.38   |                          |
|                                                                 | Cherry Juice (2)                        | 7.41                                   | -13.17 to 27.99 |                          |
|                                                                 | Grapefruit Juice (1)                    | 6.90                                   | 2.98 to 10.82   |                          |
|                                                                 | Bayberry Juice (1)                      | 4.10                                   | -2.76 to 10.96  |                          |
|                                                                 | Strawberry Juice (1)                    | 3.90                                   | -9.04 to 16.84  |                          |
|                                                                 | Blueberry Juice (1)                     | 0.00                                   | -2.27 to 2.27   |                          |
|                                                                 | Chokeberry Juice (1)                    | -1.16                                  | -2.67 to 0.35   |                          |
|                                                                 | Strawberry+Cranberry Juice (1)          | -1.16                                  | -10.02 to 7.70  |                          |
|                                                                 | Mix Juice (1)                           | 0.20                                   | -8.42 to 8.82   |                          |
| <b>Comparator</b>                                               | Placebo (20)                            | -0.61                                  | -1.72 to 0.50   | 0.003                    |
|                                                                 | Water (4)                               | 3.04                                   | -1.64 to 7.73   |                          |
|                                                                 | Control drink (1)                       | 17.80                                  | 4.94 to 30.66   |                          |
| <b>Fruit Juice energy content<br/>compared to control drink</b> | Iso-caloric (18)                        | -0.49                                  | -1.61 to 0.64   | 0.14                     |
|                                                                 | Hyper-caloric (6)                       | 2.65                                   | -1.19 to 6.49   |                          |



|                                  |                                |       |                |       |
|----------------------------------|--------------------------------|-------|----------------|-------|
|                                  | Unspecified (1)                | 0.00  | -8.33 to 8.33  |       |
| <b>Diet during trial</b>         | Usual (15)                     | -0.48 | -1.54 to 0.59  | 0.003 |
|                                  | Without confounder sources (8) | 0.05  | -2.77 to 2.87  |       |
|                                  | Controlled diet (1)            | 3.86  | -3.71 to 11.43 |       |
|                                  | Restricted energy intake (1)   | 6.90  | 2.98 to 10.82  |       |
| <b>Country of origin</b>         | Noth America (13)              | 1.18  | -0.47 to 2.83  | 0.22  |
|                                  | Europe (9)                     | -0.14 | -2.12 to 1.85  |       |
|                                  | East Asia (1)                  | 4.10  | -2.76 to 10.96 |       |
|                                  | Asia-Middle East (2)           | -0.60 | -3.64 to 2.44  |       |
| <b>Reconstituted Fruit Juice</b> | Yes (11)                       | -0.65 | -1.82 to 0.51  | 0.03  |
|                                  | No (15)                        | 1.66  | -0.02 to 3.34  |       |

| <b>F. HDL-cholesterol</b>                           |                    |               |           |
|-----------------------------------------------------|--------------------|---------------|-----------|
| <b>Variables</b> (n. of cohorts)                    | <b>Coefficient</b> | <b>95% CI</b> |           |
| <b>Age (years) (25)</b>                             | -.1863635          | -.3087853     | -.0639417 |
| <b>Length of intervention (week) (25)</b>           | .2413576           | -.2023281     | .6850434  |
| <b>Number of participants (n) (25)</b>              | .1255153           | -.0099144     | .260945   |
| <b>Gender (% men) (23)</b>                          | -.0196734          | -.070756      | .0314092  |
| <b>Year of publication (year) (25)</b>              | -.2164203          | -.6771233     | .2442827  |
| <b>Volume of Fruit Juice (ml/day) (25)</b>          | -.006098           | -.0161544     | .0039584  |
| <b>Energy intake by Fruit Juice (Kcal/day) (13)</b> | -.0059715          | -.0414075     | .0294645  |
| <b>Baseline BMI (kg/m<sup>2</sup>) (23)</b>         | .0392619           | -.3277629     | .4062867  |
| <b>Baseline total cholesterol (mg/dl) (23)</b>      | -.0138991          | -.0650726     | .0372744  |
| <b>Baseline LDL-cholesterol (mg/dl) (20)</b>        | -.0128271          | -.0841724     | .0585182  |
| <b>Baseline HDL-cholesterol (mg/dl) (23)</b>        | -.0727696          | -.1925036     | .0469644  |
| <b>Baseline triglycerides (mg/dl) (22)</b>          | .0001661           | -.0193737     | .0197059  |
| <b>Risk of bias (point) (25)</b>                    | .2681949           | -1.17805      | 1.71444   |

| <b>G. Triglycerides</b> |                                         |                                        |                   |                          |
|-------------------------|-----------------------------------------|----------------------------------------|-------------------|--------------------------|
|                         | <b>Variables<br/>(n. of cohorts)</b>    | <b>Mean<br/>Difference<br/>(mg/dl)</b> | <b>95% CI</b>     | <b>P for interaction</b> |
| <b>Study design</b>     | Cross-over (8)                          | -3.75                                  | -11.14 to 3.64    | 0.25                     |
|                         | Parallel-arm (18)                       | 2.33                                   | -4.93 to 9.59     |                          |
| <b>Type of blinding</b> | Double-blind (14)                       | 3.44                                   | -5.01 to 11.89    | 0.26                     |
|                         | Single-blind (3)                        | -6.05                                  | -14.42 to 2.31    |                          |
|                         | Open-label (8)                          | 1.55                                   | -9.00 to 12.09    |                          |
| <b>Risk factors</b>     | Healthy (5)                             | -2.55                                  | -17.11 to 12.01   | 0.95                     |
|                         | Overweight/obese (5)                    | -3.43                                  | -16.56 to 9.70    |                          |
|                         | With cardio-metabolic risk factors (15) | 0.28                                   | -5.84 to 6.40     |                          |
|                         | Other disease (1)                       | 2.50                                   | -161.35 to 166.35 |                          |
| <b>Type of Juice</b>    | Pomegranate Juice (6)                   | 5.38                                   | -19.13 to 29.90   | 0.92                     |
|                         | Cranberry Juice (5)                     | 6.23                                   | -4.62 to 17.07    |                          |
|                         | Grape Juice (4)                         | 1.49                                   | -18.19 to 21.17   |                          |
|                         | Orange Juice (2)                        | -23.12                                 | -72.06 to 25.82   |                          |
|                         | Cherry Juice (1)                        | 2.80                                   | -22.09 to 27.69   |                          |
|                         | Grapefruit Juice (1)                    | -5.10                                  | -20.70 to 10.50   |                          |
|                         | Bayberry Juice (1)                      | -5.00                                  | -38.91 to 28.91   |                          |
|                         | Strawberry Juice (1)                    | -8.85                                  | -163.29 to 145.59 |                          |
|                         | Blueberry Juice (1)                     | -8.85                                  | -47.07 to 29.37   |                          |
|                         | Bilberry Juice (1)                      | 11.50                                  | -9.31 to 32.31    |                          |
|                         | Chokeberry Juice (1)                    | -5.31                                  | -13.97 to 3.35    |                          |
|                         | Strawberry+Cranberry Juice (1)          | -3.54                                  | -85.07 to 77.99   |                          |
|                         | Mix Juice (1)                           | -8.40                                  | -39.76 to 22.96   |                          |
| <b>Comparator</b>       | Placebo (21)                            | -0.87                                  | -6.64 to 4.90     | 0.87                     |
|                         | Water (5)                               | 0.25                                   | -11.51 to 12.01   |                          |

|                                                             |                                 |       |                 |      |
|-------------------------------------------------------------|---------------------------------|-------|-----------------|------|
| <b>Fruit Juice energy content compared to control drink</b> | Iso-caloric (18)                | -1.31 | -7.16 to 4.55   | 0.89 |
|                                                             | Hyper-caloric (7)               | 1.76  | -9.57 to 13.08  |      |
|                                                             | Unspecified (1)                 | 0.00  | -57.23 to 57.23 |      |
| <b>Diet during trial</b>                                    | Usual (14)                      | -3.55 | -10.83 to 3.74  | 0.36 |
|                                                             | Without confounder sources (10) | 5.59  | -3.13 to 14.30  |      |
|                                                             | Controlled diet (1)             | -8.85 | -38.25 to 20.55 |      |
|                                                             | Restricted energy intake (1)    | -5.10 | -20.70 to 10.50 |      |
| <b>Country of origin</b>                                    | Noth America (13)               | 1.52  | -6.30 to 9.33   | 0.90 |
|                                                             | Europe (10)                     | -2.33 | -9.47 to 4.81   |      |
|                                                             | East Asia (1)                   | -5.00 | -38.91 to 28.91 |      |
|                                                             | Asia-Middle East (2)            | 1.95  | -46.70 to 50.61 |      |
| <b>Reconstituted Fruit Juice</b>                            | Yes (11)                        | -0.15 | -6.34 to 6.04   | 0.77 |
|                                                             | No (15)                         | -1.84 | -11.30 to 7.61  |      |

| <b>H. Triglycerides</b>                             |                    |               |          |
|-----------------------------------------------------|--------------------|---------------|----------|
| <b>Variables</b> (n. of cohorts)                    | <b>Coefficient</b> | <b>95% CI</b> |          |
| <b>Age (years) (26)</b>                             | .0686716           | -.4432899     | .5806331 |
| <b>Length of intervention (week) (26)</b>           | -1.053352          | -3.064975     | .9582709 |
| <b>Number of participants (n) (26)</b>              | -.1542805          | -.6537077     | .3451467 |
| <b>Gender (% men) (24)</b>                          | -.0867644          | -.3138965     | .1403678 |
| <b>Year of publication (year) (26)</b>              | -1.649902          | -3.507787     | .2079838 |
| <b>Volume of Fruit Juice (ml/day) (26)</b>          | .0202564           | -.01706       | .0575728 |
| <b>Energy intake by Fruit Juice (Kcal/day) (13)</b> | .0167375           | -.0789498     | .1124249 |
| <b>Baseline BMI (kg/m<sup>2</sup>) (24)</b>         | .5578336           | -.4188746     | 1.534542 |
| <b>Baseline total cholesterol (mg/dl) (24)</b>      | .0762774           | -.2006492     | .3532041 |
| <b>Baseline LDL-cholesterol (mg/dl) (21)</b>        | .0601829           | -.3564828     | .4768487 |
| <b>Baseline HDL-cholesterol (mg/dl) (23)</b>        | -.4025435          | -1.113005     | .3079182 |
| <b>Baseline triglycerides (mg/dl) (24)</b>          | .1124303           | -.0965081     | .3213688 |
| <b>Risk of bias (point) (26)</b>                    | -2.099691          | -9.09653      | 4.897149 |

**Supplemental Table 11. Subgroup analysis and meta-regression analysis of the effect of fruit juice consumption on glucose metabolism**

| <b>A. Glucose</b>                 |                                         |                                        |                 |                          |
|-----------------------------------|-----------------------------------------|----------------------------------------|-----------------|--------------------------|
|                                   | <b>Variables<br/>(n. of cohorts)</b>    | <b>Mean<br/>Difference<br/>(mg/dl)</b> | <b>95% CI</b>   | <b>P for interaction</b> |
| <b>Study design</b>               | Cross-over (9)                          | -0.64                                  | -2.44 to 1.15   | 0.20                     |
|                                   | Parallel-arm (14)                       | -0.64                                  | -6.27 to 5.00   |                          |
| <b>Type of blinding</b>           | Double-blind (15)                       | -1.57                                  | -6.53 to 3.40   | 0.01                     |
|                                   | Single-blind (3)                        | 0.40                                   | -1.61 to 2.40   |                          |
|                                   | Open-label (5)                          | 0.50                                   | -2.64 to 3.64   |                          |
| <b>Risk factors</b>               | Healthy (3)                             | -2.23                                  | -6.76 to 2.30   | 0.44                     |
|                                   | Overweight/obese (5)                    | 0.83                                   | -2.16 to 3.83   |                          |
|                                   | With cardio-metabolic risk factors (14) | -1.29                                  | -6.41 to 3.83   |                          |
|                                   | Other disease (1)                       | 3.60                                   | -45.01 to 52.21 |                          |
| <b>Type of Juice</b>              | Pomegranate Juice (7)                   | -0.27                                  | -4.70 to 4.16   | 0.001                    |
|                                   | Cranberry Juice (4)                     | -6.81                                  | -19.96 to 6.35  |                          |
|                                   | Grape Juice (4)                         | -0.04                                  | -4.54 to 4.46   |                          |
|                                   | Orange Juice (2)                        | -1.04                                  | -8.73 to 6.65   |                          |
|                                   | Cherry Juice (1)                        | 6.40                                   | -1.79 to 14.59  |                          |
|                                   | Grapefruit Juice (1)                    | 1.80                                   | -2.08 to 5.68   |                          |
|                                   | Bayberry Juice (1)                      | -5.41                                  | -10.70 to -0.12 |                          |
|                                   | Strawberry Juice (1)                    | 1.80                                   | -11.98 to 15.58 |                          |
|                                   | Blueberry Juice (1)                     | 3.60                                   | -6.65 to 13.85  |                          |
|                                   | Chokeberry Juice (1)                    | 0.36                                   | -1.76 to 2.48   |                          |
| <b>Comparator</b>                 | Placebo (19)                            | -1.63                                  | -5.16 to 1.89   | 0.05                     |
|                                   | Water (4)                               | 2.09                                   | -1.40 to 5.57   |                          |
| <b>Fruit Juice energy content</b> | Iso-caloric (15)                        | -0.49                                  | -2.25 to 1.26   | 0.06                     |

|                                  |                                |       |                 |       |
|----------------------------------|--------------------------------|-------|-----------------|-------|
| <b>compared to control drink</b> | Hyper-caloric (7)              | -2.34 | -12.50 to 7.81  |       |
|                                  | Unspecified (1)                | 1.80  | -8.80 to 12.40  |       |
| <b>Diet during trial</b>         | Usual (14)                     | -0.90 | -5.93 to 4.12   |       |
|                                  | Without confounder sources (7) | -1.69 | -4.99 to 1.60   | 0.39  |
|                                  | Controlled diet (1)            | -2.88 | -7.37 to 1.61   |       |
|                                  | Restricted energy intake (1)   | 1.80  | -2.08 to 5.68   |       |
| <b>Country of origin</b>         | Noth America (12)              | 0.45  | -1.71 to 2.60   |       |
|                                  | Europe (7)                     | 0.19  | -1.69 to 2.06   | 0.001 |
|                                  | East Asia (1)                  | -5.41 | -10.70 to -0.12 |       |
|                                  | Asia-Middle East (3)           | -8.17 | -29.15 to 12.80 |       |
| <b>Reconstituted Fruit Juice</b> | Yes (7)                        | 1.00  | -0.94 to 2.93   | 0.002 |
|                                  | No (16)                        | -2.23 | -6.34 to 1.88   |       |

| <b>B. Glucose</b>                                   |                    |               |           |
|-----------------------------------------------------|--------------------|---------------|-----------|
| <b>Variables</b> (n. of cohorts)                    | <b>Coefficient</b> | <b>95% CI</b> |           |
| <b>Age (years) (23)</b>                             | -.0519172          | -.305844      | .2020095  |
| <b>Length of intervention (week) (23)</b>           | -.3375352          | -1.180918     | .5058476  |
| <b>Number of participants (n) (23)</b>              | -.1732439          | -.4049484     | .0584606  |
| <b>Gender (% men) (21)</b>                          | -.1983727          | -.3003487     | -.0963967 |
| <b>Year of publication (year) (23)</b>              | .5575233           | -.9171019     | 2.032149  |
| <b>Volume of Fruit Juice (ml/day) (23)</b>          | .0099321           | -.0152675     | .0351318  |
| <b>Energy intake by Fruit Juice (Kcal/day) (14)</b> | -.0043021          | -.029963      | .0213588  |
| <b>Baseline BMI (kg/m<sup>2</sup>) (21)</b>         | .3435247           | -.4422309     | 1.12928   |
| <b>Baseline glucose (mg/dl) (21)</b>                | -.1608723          | -.3420349     | .0202903  |
| <b>Baseline HOMA index (Unit) (8)</b>               | 2.66177            | -1.184907     | 6.508448  |
| <b>Baseline Insulin (mIU/L) (10)</b>                | .3039095           | -.4607158     | 1.068535  |
| <b>Risk of bias (point) (23)</b>                    | -1.971158          | -5.547064     | 1.604748  |



| <b>C. HOMA index</b>                                            |                                        |                                       |               |                          |
|-----------------------------------------------------------------|----------------------------------------|---------------------------------------|---------------|--------------------------|
|                                                                 | <b>Variables<br/>(n. of cohorts)</b>   | <b>Mean<br/>Difference<br/>(Unit)</b> | <b>95% CI</b> | <b>P for interaction</b> |
| <b>Study design</b>                                             | Cross-over (5)                         | -0.18                                 | -0.63 to 0.27 | 0.28                     |
|                                                                 | Parallel-arm (6)                       | 0.14                                  | -0.23 to 0.52 |                          |
| <b>Type of blinding</b>                                         | Double-blind (7)                       | -0.10                                 | -0.51 to 0.31 | 0.73                     |
|                                                                 | Single-blind (2)                       | 0.27                                  | -0.89 to 1.43 |                          |
|                                                                 | Open-label (2)                         | 0.06                                  | -0.80 to 0.93 |                          |
| <b>Risk factors</b>                                             | Healthy (2)                            | -0.03                                 | -0.50 to 0.43 | 0.95                     |
|                                                                 | Overweight/obese (2)                   | 0.06                                  | -0.80 to 0.93 |                          |
|                                                                 | With cardio-metabolic risk factors (7) | -0.01                                 | -0.56 to 0.54 |                          |
| <b>Type of Juice</b>                                            | Pomegranate Juice (3)                  | -0.27                                 | -0.94 to 0.39 | 0.45                     |
|                                                                 | Cranberry Juice (2)                    | -0.15                                 | -0.72 to 0.43 |                          |
|                                                                 | Grape Juice (1)                        | -0.50                                 | -1.68 to 0.68 |                          |
|                                                                 | Orange Juice (1)                       | -0.29                                 | -1.25 to 0.67 |                          |
|                                                                 | Cherry Juice (1)                       | -0.50                                 | -2.62 to 1.62 |                          |
|                                                                 | Grapefruit Juice (1)                   | 0.50                                  | -0.19 to 1.19 |                          |
|                                                                 | Bayberry Juice (1)                     | 0.10                                  | -0.64 to 0.84 |                          |
| Blueberry Juice (1)                                             | 0.90                                   | -0.22 to 2.02                         |               |                          |
| <b>Comparator</b>                                               | Placebo (9)                            | -0.18                                 | -0.52 to 0.15 | 0.02                     |
|                                                                 | Water (2)                              | 0.61                                  | 0.02 to 1.19  |                          |
| <b>Fruit Juice energy content<br/>compared to control drink</b> | Iso-caloric (9)                        | -0.18                                 | -0.52 to 0.15 | 0.02                     |
|                                                                 | Hyper-caloric (2)                      | 0.61                                  | 0.02 to 1.19  |                          |
| <b>Diet during trial</b>                                        | Usual (6)                              | -0.08                                 | -0.55 to 0.40 | 0.49                     |
|                                                                 | Without confounder sources (3)         | -0.10                                 | -0.71 to 0.50 |                          |
|                                                                 | Controlled diet (1)                    | -0.12                                 | -0.72 to 0.48 |                          |
|                                                                 | Restricted energy intake (1)           | 0.50                                  | -0.19 to 1.19 |                          |
| <b>Country of origin</b>                                        | Noth America (6)                       | 0.13                                  | -0.28 to 0.54 | 0.53                     |
|                                                                 | Europe (2)                             | -0.35                                 | -0.92 to 0.22 |                          |
|                                                                 | East Asia (1)                          | 0.10                                  | -0.64 to 0.84 |                          |
|                                                                 | Asia-Middle East (2)                   | 0.52                                  | -1.42 to 2.46 |                          |

|                                  |         |       |               |      |
|----------------------------------|---------|-------|---------------|------|
| <b>Reconstituted Fruit Juice</b> | Yes (3) | 0.38  | -0.56 to 1.33 | 0.36 |
|                                  | No (8)  | -0.04 | -0.34 to 0.27 |      |

| <b>D. HOMA index</b>                               |                    |               |          |
|----------------------------------------------------|--------------------|---------------|----------|
| <b>Variables</b> (n. of cohorts)                   | <b>Coefficient</b> | <b>95% CI</b> |          |
| <b>Age (years) (11)</b>                            | -0.0115631         | -0.0416732    | .018547  |
| <b>Length of intervention (week) (11)</b>          | .0327783           | -0.0682094    | .133766  |
| <b>Number of participants (n) (11)</b>             | .0114502           | -0.017769     | .0406694 |
| <b>Gender (% men) (11)</b>                         | -0.012389          | -0.0262751    | .0014971 |
| <b>Year of publication (year) (11)</b>             | -0.0637805         | -0.221108     | .0935471 |
| <b>Volume of Fruit Juice (ml/day) (11)</b>         | -0.0012117         | -0.0034442    | .0010208 |
| <b>Energy intake by Fruit Juice (Kcal/day) (8)</b> | -0.0016061         | -0.007103     | .0038908 |
| <b>Baseline BMI (kg/m<sup>2</sup>) (10)</b>        | .0811181           | -0.0061392    | .1683755 |
| <b>Baseline glucose (mg/dl) (8)</b>                | .0051798           | -0.0303702    | .0407297 |
| <b>Baseline HOMA index (Unit) (9)</b>              | .0701068           | -.53783       | .6780436 |
| <b>Baseline Insulin (mIU/L) (7)</b>                | .035834            | -.142069      | .213737  |
| <b>Risk of bias (point) (11)</b>                   | -0.0775085         | -0.3540795    | .1990624 |

| <b>E. Insulin</b>                                               |                                        |                                    |                  |                          |
|-----------------------------------------------------------------|----------------------------------------|------------------------------------|------------------|--------------------------|
|                                                                 | <b>Variables<br/>(n. of cohorts)</b>   | <b>Mean<br/>Difference<br/>(%)</b> | <b>95% CI</b>    | <b>P for interaction</b> |
| <b>Study design</b>                                             | Cross-over (6)                         | 7.04                               | -8.12 to 22.20   | 0.51                     |
|                                                                 | Parallel-arm (5)                       | -0.03                              | -14.80 to 14.73  |                          |
| <b>Type of blinding</b>                                         | Double-blind (8)                       | 5.08                               | -7.78 to 17.93   | 0.65                     |
|                                                                 | Open-label (3)                         | -0.08                              | -18.70 to 18.54  |                          |
| <b>Risk factors</b>                                             | Healthy (2)                            | 2.46                               | -21.42 to 26.33  | 0.98                     |
|                                                                 | Overweight/obese (4)                   | 2.33                               | -15.58 to 20.24  |                          |
|                                                                 | With cardio-metabolic risk factors (5) | 4.65                               | -11.03 to 20.33  |                          |
| <b>Type of Juice</b>                                            | Pomegranate Juice (3)                  | 13.94                              | -4.37 to 32.26   | 0.77                     |
|                                                                 | Cranberry Juice (2)                    | -5.23                              | -32.21 to 21.74  |                          |
|                                                                 | Grape Juice (2)                        | -11.46                             | -44.52 to 21.59  |                          |
|                                                                 | Orange Juice (1)                       | -12.66                             | -106.68 to 81.36 |                          |
|                                                                 | Cherry Juice (1)                       | -21.20                             | -79.61 to 37.21  |                          |
|                                                                 | Grapefruit Juice (1)                   | 3.00                               | -17.29 to 23.29  |                          |
|                                                                 | Bayberry Juice (1)                     | 8.40                               | -26.27 to 43.07  |                          |
| <b>Comparator</b>                                               | Placebo (10)                           | 3.57                               | -8.83 to 15.96   | 0.96                     |
|                                                                 | Water (1)                              | 3.00                               | -17.29 to 23.29  |                          |
| <b>Fruit Juice energy content<br/>compared to control drink</b> | Iso-caloric (9)                        | 2.50                               | -10.12 to 15.13  | 0.68                     |
|                                                                 | Hyper-caloric (1)                      | 3.00                               | -17.29 to 23.29  |                          |
|                                                                 | Unspecified (1)                        | 32.30                              | -33.36 to 97.96  |                          |
| <b>Diet during trial</b>                                        | Usual (5)                              | 7.36                               | -8.49 to 23.20   | 0.90                     |
|                                                                 | Without confounder sources (4)         | -2.14                              | -27.12 to 22.85  |                          |
|                                                                 | Controlled diet (1)                    | -2.90                              | -35.83 to 30.03  |                          |
|                                                                 | Restricted energy intake (1)           | 3.00                               | -17.29 to 23.29  |                          |
| <b>Country of origin</b>                                        | Noth America (7)                       | -1.74                              | -15.55 to 12.07  | 0.40                     |
|                                                                 | Europe (2)                             | -16.52                             | -63.41 to 30.37  |                          |
|                                                                 | East Asia (1)                          | 8.40                               | -26.27 to 43.07  |                          |
|                                                                 | Asia-Middle East (1)                   | 16.68                              | -3.70 to 37.06   |                          |
| <b>Reconstituted Fruit Juice</b>                                | Yes (3)                                | -14.18                             | -48.31 to 19.96  | 0.29                     |

|        |      |                |
|--------|------|----------------|
| No (8) | 5.28 | -5.84 to 16.41 |
|--------|------|----------------|

| <b>F. Insulin</b>                                  |                    |               |          |
|----------------------------------------------------|--------------------|---------------|----------|
| <b>Variables</b> (n. of cohorts)                   | <b>Coefficient</b> | <b>95% CI</b> |          |
| <b>Age (years) (11)</b>                            | -.3330365          | -1.209831     | .5437584 |
| <b>Length of intervention (week) (11)</b>          | -1.328579          | -3.729908     | 1.07275  |
| <b>Number of participants (n) (11)</b>             | -.2156451          | -1.146235     | .7149452 |
| <b>Gender (% men) (10)</b>                         | -.2363909          | -1.002917     | .5301354 |
| <b>Year of publication (year) (11)</b>             | 2.288499           | -2.478942     | 7.055939 |
| <b>Volume of Fruit Juice (ml/day) (11)</b>         | -.0096196          | -.082626      | .0633869 |
| <b>Energy intake by Fruit Juice (Kcal/day) (7)</b> | -.0407179          | -.2900348     | .2085989 |
| <b>Baseline BMI (kg/m<sup>2</sup>) (9)</b>         | .9989227           | -2.865285     | 4.863131 |
| <b>Baseline glucose (mg/dl) (10)</b>               | .304036            | -.2717005     | .8797724 |
| <b>Baseline HOMA index (Unit) (7)</b>              | 9.544391           | -12.17246     | 31.26124 |
| <b>Baseline Insulin (mIU/L) (10)</b>               | .0520487           | -3.902234     | 4.006332 |
| <b>Risk of bias (point) (11)</b>                   | -1.408192          | -19.86313     | 17.04675 |
